# Supplementary material for: Enhanced contact investigations for nine early travel-related cases of SARS-CoV-2 in the United States
Source: PLoS One. 2020 Sep 2;15(9):e0238342. doi: 10.1371/journal.pone.0238342 (PMC7467265; doi:10.1371/journal.pone.0238342)
Supplement: S1 File — (XLSX) [file pone.0238342.s004.xlsx]

## Sheet: Data
Contact_ID	source_case	PUI_YN	mastertype	master_expset	ongoing_HHexp	case	anysample	sampled_gt1vsnot	ContactQ_Sex	ContactQ_agecat	ContactQ_race_ethcat	ContactQ_smokingcat	ContactQ_CVD_any	ContactQ_CLD_any	ContactQ_immsupp_any	ContactQ_diabetes_any	ContactQ_relat_spousepartner	ContactQ_pexp_ftf_yn	ContactQ_ftf_dur_cat2	ContactQ_pexp_phys_yn	ContactQ_pexp_obj_yn	ContactQ_pexp_veh_yn	ContactQ_veh_dur_cat	ContactQ_pexp_6ft_yn	ContactQ_6ft_dur_cat2	ContactQ_pexp_cgh_yn	ContactQ_pexp_rm_yn	ContactQ_rm_dur_cat2	HCWQ_carePPE_cat	HCWQ_Cared_NOGloves_YN	HCWQ_Cared_NOGown_YN	HCWQ_Cared_NOGoggles_YN	HCWQ_Cared_NonFittedResp_YN	HCWQ_Cared_MaskOnly_YN	HCWQ_Cared_NOMaskorResp_YN	HCWQ_NPOP_PPE_cat	HCWQ_NPOP_NOGown_YN	HCWQ_NPOP_NOGloves_YN	HCWQ_NPOP_NOGoggles_YN	HCWQ_NPOP_MaskOnly_YN	HCWQ_NPOP_NOMaskorResp_YN	HCWQ_cared_forpt	HCWQ_took_NPOP
C-001	C	1	Community - Other	Workplace (non-HC)	0	0	1	1	2	45 - 64 years	White, Non-Hispanic	0	0	0	0	0	0	1	< 15 minutes	0	1	0	#N/A	1	< 15 minutes	0	1	< 15 minutes	#N/A	#N/A	#N/A	#N/A	#N/A	#N/A	#N/A	#N/A	#N/A	#N/A	#N/A	#N/A	#N/A	#N/A	#N/A
C-002	C	1	Community - Healthcare Setting	Healthcare	0	0	1	0	2	18 - 44 years	White, Non-Hispanic	1	0	0	0	0	0	0	#N/A	0	0	0	#N/A	0	#N/A	0	#N/A	#N/A	#N/A	#N/A	#N/A	#N/A	#N/A	#N/A	#N/A	#N/A	#N/A	#N/A	#N/A	#N/A	#N/A	#N/A	#N/A
C-003	C	0	Community - Other	Workplace (non-HC)	0	0	1	0	1	45 - 64 years	#N/A	0	0	0	0	0	0	1	#N/A	1	1	0	#N/A	1	#N/A	0	1	#N/A	#N/A	#N/A	#N/A	#N/A	#N/A	#N/A	#N/A	#N/A	#N/A	#N/A	#N/A	#N/A	#N/A	#N/A	#N/A
C-004	C	0	Community - Other	Workplace (non-HC)	0	0	1	0	1	18 - 44 years	Asian	0	0	0	0	0	0	1	< 15 minutes	0	1	0	#N/A	1	#N/A	0	1	#N/A	#N/A	#N/A	#N/A	#N/A	#N/A	#N/A	#N/A	#N/A	#N/A	#N/A	#N/A	#N/A	#N/A	#N/A	#N/A
C-005	C	0	Community - Other	Workplace (non-HC)	0	0	1	0	1	18 - 44 years	Asian	#N/A	0	0	0	0	0	1	< 15 minutes	0	1	0	#N/A	1	< 15 minutes	0	0	#N/A	#N/A	#N/A	#N/A	#N/A	#N/A	#N/A	#N/A	#N/A	#N/A	#N/A	#N/A	#N/A	#N/A	#N/A	#N/A
C-006	C	0	Community - Other	Workplace (non-HC)	0	0	1	0	1	18 - 44 years	Asian	2	0	1	0	0	0	1	< 15 minutes	1	1	1	< 1 hour	1	< 15 minutes	0	1	< 15 minutes	#N/A	#N/A	#N/A	#N/A	#N/A	#N/A	#N/A	#N/A	#N/A	#N/A	#N/A	#N/A	#N/A	#N/A	#N/A
C-007	C	0	Community - Other	Workplace (non-HC)	0	0	1	0	1	18 - 44 years	Asian	0	0	1	0	0	0	1	#N/A	0	1	1	> 1 hour	1	#N/A	0	1	#N/A	#N/A	#N/A	#N/A	#N/A	#N/A	#N/A	#N/A	#N/A	#N/A	#N/A	#N/A	#N/A	#N/A	#N/A	#N/A
C-008	C	0	Community - Other	Workplace (non-HC)	0	0	1	0	1	45 - 64 years	White, Non-Hispanic	1	1	1	0	0	0	1	< 15 minutes	1	1	0	#N/A	1	< 15 minutes	0	0	#N/A	#N/A	#N/A	#N/A	#N/A	#N/A	#N/A	#N/A	#N/A	#N/A	#N/A	#N/A	#N/A	#N/A	#N/A	#N/A
C-009	C	0	Community - Other	Workplace (non-HC)	0	0	1	0	1	45 - 64 years	Asian	0	0	0	0	0	0	1	< 15 minutes	1	1	0	#N/A	1	#N/A	0	1	#N/A	#N/A	#N/A	#N/A	#N/A	#N/A	#N/A	#N/A	#N/A	#N/A	#N/A	#N/A	#N/A	#N/A	#N/A	#N/A
C-010	C	1	Community - Healthcare Setting	Healthcare	0	0	1	1	2	18 - 44 years	White, Non-Hispanic	0	0	1	0	0	0	#N/A	#N/A	0	0	0	#N/A	0	#N/A	0	#N/A	#N/A	#N/A	#N/A	#N/A	#N/A	#N/A	#N/A	#N/A	#N/A	#N/A	#N/A	#N/A	#N/A	#N/A	#N/A	#N/A
C-011	C	1	Community - Other	Workplace (non-HC)	0	0	1	0	1	18 - 44 years	Asian	0	0	0	0	0	0	1	< 15 minutes	1	1	0	#N/A	1	< 15 minutes	0	1	< 15 minutes	#N/A	#N/A	#N/A	#N/A	#N/A	#N/A	#N/A	#N/A	#N/A	#N/A	#N/A	#N/A	#N/A	#N/A	#N/A
C-012	C	0	Community - Other	Workplace (non-HC)	0	0	1	0	1	45 - 64 years	Asian	0	0	0	0	0	0	1	>= 15 minutes	0	0	0	#N/A	1	>= 15 minutes	0	1	15 minutes - < 3 hours	#N/A	#N/A	#N/A	#N/A	#N/A	#N/A	#N/A	#N/A	#N/A	#N/A	#N/A	#N/A	#N/A	#N/A	#N/A
C-013	C	0	Healthcare Worker*	Healthcare	0	0	1	0	1	18 - 44 years	Hispanic/Latino	1	0	0	0	0	0	0	#N/A	0	0	0	#N/A	0	#N/A	0	0	#N/A	#N/A	#N/A	#N/A	#N/A	#N/A	#N/A	#N/A	#N/A	#N/A	#N/A	#N/A	#N/A	#N/A	0	0
C-014	C	0	Healthcare Worker*	Healthcare	0	0	0	0	2	45 - 64 years	White, Non-Hispanic	0	1	1	0	0	0	1	< 15 minutes	1	1	0	#N/A	1	< 15 minutes	1	1	< 15 minutes	0	1	1	1	0	1	0	#N/A	#N/A	0	0	0	0	1	0
C-015	C	0	Healthcare Worker*	Healthcare	0	0	1	0	2	18 - 44 years	White, Non-Hispanic	0	0	0	0	0	0	1	< 15 minutes	1	0	0	#N/A	1	< 15 minutes	0	1	< 15 minutes	0	0	1	1	0	0	0	#N/A	#N/A	0	0	0	0	1	0
C-016	C	0	Healthcare Worker*	Healthcare	0	0	1	0	2	18 - 44 years	White, Non-Hispanic	0	0	1	0	0	0	1	< 15 minutes	1	1	0	#N/A	1	< 15 minutes	1	1	< 15 minutes	0	1	1	1	0	1	0	#N/A	#N/A	0	0	0	0	1	0
C-017	C	0	Healthcare Worker*	Healthcare	0	0	1	0	2	18 - 44 years	Hispanic/Latino	0	0	0	0	0	0	#N/A	#N/A	#N/A	#N/A	#N/A	#N/A	#N/A	#N/A	#N/A	#N/A	#N/A	#N/A	#N/A	#N/A	#N/A	#N/A	#N/A	#N/A	#N/A	#N/A	#N/A	#N/A	#N/A	#N/A	0	0
C-018	C	1	Healthcare Worker*	Healthcare	0	0	1	1	1	45 - 64 years	White, Non-Hispanic	1	0	1	0	0	0	1	>= 15 minutes	1	1	0	#N/A	1	>= 15 minutes	0	1	15 minutes - < 3 hours	0	1	1	1	0	0	0	0	1	#N/A	1	#N/A	#N/A	1	1
C-019	C	0	Healthcare Worker*	Healthcare	0	0	1	0	1	18 - 44 years	White, Non-Hispanic	1	0	0	0	#N/A	0	0	#N/A	0	0	0	#N/A	1	>= 15 minutes	1	1	< 15 minutes	#N/A	#N/A	#N/A	#N/A	#N/A	#N/A	#N/A	#N/A	#N/A	#N/A	#N/A	#N/A	#N/A	0	0
C-020	C	0	Community - Healthcare Setting	Healthcare	0	0	0	0	1	45 - 64 years	White, Non-Hispanic	1	1	0	0	0	0	#N/A	#N/A	#N/A	#N/A	#N/A	#N/A	#N/A	#N/A	#N/A	#N/A	#N/A	#N/A	#N/A	#N/A	#N/A	#N/A	#N/A	#N/A	#N/A	#N/A	#N/A	#N/A	#N/A	#N/A	#N/A	#N/A
C-021	C	0	Community - Healthcare Setting	Healthcare	0	0	1	0	2	45 - 64 years	White, Non-Hispanic	2	0	1	0	0	0	#N/A	#N/A	0	0	0	#N/A	#N/A	#N/A	#N/A	0	#N/A	#N/A	#N/A	#N/A	#N/A	#N/A	#N/A	#N/A	#N/A	#N/A	#N/A	#N/A	#N/A	#N/A	#N/A	#N/A
C-022	C	0	Community - Healthcare Setting	Healthcare	0	0	1	0	1	45 - 64 years	White, Non-Hispanic	#N/A	1	0	0	0	0	0	#N/A	0	0	#N/A	#N/A	#N/A	#N/A	#N/A	#N/A	#N/A	#N/A	#N/A	#N/A	#N/A	#N/A	#N/A	#N/A	#N/A	#N/A	#N/A	#N/A	#N/A	#N/A	#N/A	#N/A
C-024	C	1	Community - Healthcare Setting	Healthcare	0	0	1	1	1	45 - 64 years	White, Non-Hispanic	0	1	0	0	1	0	0	#N/A	0	0	0	#N/A	1	< 15 minutes	0	1	#N/A	#N/A	#N/A	#N/A	#N/A	#N/A	#N/A	#N/A	#N/A	#N/A	#N/A	#N/A	#N/A	#N/A	#N/A	#N/A
C-025	C	1	Community - Healthcare Setting	Healthcare	0	0	1	0	2	18 - 44 years	White, Non-Hispanic	0	0	0	0	0	0	0	#N/A	#N/A	#N/A	#N/A	#N/A	#N/A	#N/A	#N/A	#N/A	#N/A	#N/A	#N/A	#N/A	#N/A	#N/A	#N/A	#N/A	#N/A	#N/A	#N/A	#N/A	#N/A	#N/A	#N/A	#N/A
C-026	C	0	Community - Healthcare Setting	Healthcare	0	0	1	0	2	65+ years	White, Non-Hispanic	0	0	0	0	1	0	0	#N/A	0	0	0	#N/A	#N/A	#N/A	0	1	#N/A	#N/A	#N/A	#N/A	#N/A	#N/A	#N/A	#N/A	#N/A	#N/A	#N/A	#N/A	#N/A	#N/A	#N/A	#N/A
C-027	C	0	Community - Healthcare Setting	Healthcare	0	0	1	0	1	45 - 64 years	White, Non-Hispanic	0	1	0	0	1	0	#N/A	#N/A	#N/A	#N/A	#N/A	#N/A	#N/A	#N/A	#N/A	#N/A	#N/A	#N/A	#N/A	#N/A	#N/A	#N/A	#N/A	#N/A	#N/A	#N/A	#N/A	#N/A	#N/A	#N/A	#N/A	#N/A
C-028	C	0	Community - Healthcare Setting	Healthcare	0	0	1	0	1	65+ years	White, Non-Hispanic	0	1	0	0	0	0	0	#N/A	0	0	0	#N/A	0	#N/A	0	1	15 minutes - < 3 hours	#N/A	#N/A	#N/A	#N/A	#N/A	#N/A	#N/A	#N/A	#N/A	#N/A	#N/A	#N/A	#N/A	#N/A	#N/A
C-031	C	0	Community - Healthcare Setting	Healthcare	0	0	1	0	1	65+ years	White, Non-Hispanic	2	1	0	0	0	0	0	#N/A	0	0	0	#N/A	0	#N/A	0	0	#N/A	#N/A	#N/A	#N/A	#N/A	#N/A	#N/A	#N/A	#N/A	#N/A	#N/A	#N/A	#N/A	#N/A	#N/A	#N/A
C-034	C	0	Community - Healthcare Setting	Healthcare	0	0	1	0	1	65+ years	White, Non-Hispanic	1	0	0	1	0	0	0	#N/A	0	0	0	#N/A	#N/A	#N/A	#N/A	#N/A	#N/A	#N/A	#N/A	#N/A	#N/A	#N/A	#N/A	#N/A	#N/A	#N/A	#N/A	#N/A	#N/A	#N/A	#N/A	#N/A
C-036	C	0	Community - Healthcare Setting	Healthcare	0	0	1	0	2	45 - 64 years	White, Non-Hispanic	0	0	0	0	1	0	0	#N/A	0	0	0	#N/A	1	< 15 minutes	0	1	#N/A	#N/A	#N/A	#N/A	#N/A	#N/A	#N/A	#N/A	#N/A	#N/A	#N/A	#N/A	#N/A	#N/A	#N/A	#N/A
C-038	C	0	Community - Healthcare Setting	Healthcare	0	0	1	0	2	45 - 64 years	White, Non-Hispanic	1	1	0	0	0	0	0	#N/A	0	0	0	#N/A	#N/A	#N/A	0	0	#N/A	#N/A	#N/A	#N/A	#N/A	#N/A	#N/A	#N/A	#N/A	#N/A	#N/A	#N/A	#N/A	#N/A	#N/A	#N/A
C-039	C	0	Community - Healthcare Setting	Healthcare	0	0	1	0	2	18 - 44 years	Hispanic/Latino	0	0	0	0	0	0	#N/A	#N/A	#N/A	#N/A	0	#N/A	#N/A	#N/A	#N/A	#N/A	#N/A	#N/A	#N/A	#N/A	#N/A	#N/A	#N/A	#N/A	#N/A	#N/A	#N/A	#N/A	#N/A	#N/A	#N/A	#N/A
C-040	C	0	Community - Other	Workplace (non-HC)	0	0	1	0	1	18 - 44 years	Asian	1	0	0	0	0	0	1	< 15 minutes	1	1	1	< 1 hour	1	#N/A	0	1	#N/A	#N/A	#N/A	#N/A	#N/A	#N/A	#N/A	#N/A	#N/A	#N/A	#N/A	#N/A	#N/A	#N/A	#N/A	#N/A
C-044	C	0	Community - Healthcare Setting	Healthcare	0	0	1	0	1	65+ years	#N/A	0	1	0	0	0	0	0	#N/A	0	0	0	#N/A	0	#N/A	0	0	#N/A	#N/A	#N/A	#N/A	#N/A	#N/A	#N/A	#N/A	#N/A	#N/A	#N/A	#N/A	#N/A	#N/A	#N/A	#N/A
C-045	C	0	Community - Healthcare Setting	Healthcare	0	0	1	0	2	65+ years	#N/A	0	1	1	0	0	0	0	#N/A	0	0	0	#N/A	0	#N/A	0	0	#N/A	#N/A	#N/A	#N/A	#N/A	#N/A	#N/A	#N/A	#N/A	#N/A	#N/A	#N/A	#N/A	#N/A	#N/A	#N/A
C-046	C	0	Community - Healthcare Setting	Healthcare	0	0	1	0	2	< 10 years	Hispanic/Latino	0	0	0	0	0	0	#N/A	#N/A	#N/A	#N/A	0	#N/A	#N/A	#N/A	#N/A	#N/A	#N/A	#N/A	#N/A	#N/A	#N/A	#N/A	#N/A	#N/A	#N/A	#N/A	#N/A	#N/A	#N/A	#N/A	#N/A	#N/A
C-047	C	0	Community - Healthcare Setting	Healthcare	0	0	1	0	1	18 - 44 years	Hispanic/Latino	0	0	0	0	0	0	#N/A	#N/A	#N/A	#N/A	0	#N/A	#N/A	#N/A	#N/A	#N/A	#N/A	#N/A	#N/A	#N/A	#N/A	#N/A	#N/A	#N/A	#N/A	#N/A	#N/A	#N/A	#N/A	#N/A	#N/A	#N/A
C-048	C	0	Community - Healthcare Setting	Healthcare	0	0	1	0	2	18 - 44 years	White, Non-Hispanic	0	0	1	0	0	0	#N/A	#N/A	0	#N/A	#N/A	#N/A	#N/A	#N/A	#N/A	#N/A	#N/A	#N/A	#N/A	#N/A	#N/A	#N/A	#N/A	#N/A	#N/A	#N/A	#N/A	#N/A	#N/A	#N/A	#N/A	#N/A
F-001	F	0	Healthcare Worker*	Healthcare	0	0	1	0	1	18 - 44 years	White, Non-Hispanic	#N/A	#N/A	#N/A	#N/A	#N/A	0	#N/A	#N/A	#N/A	#N/A	#N/A	#N/A	#N/A	#N/A	#N/A	#N/A	#N/A	0	0	0	1	0	0	0	#N/A	#N/A	#N/A	#N/A	#N/A	#N/A	1	0
F-002	F	1	Healthcare Worker*	Healthcare	0	0	1	0	2	18 - 44 years	White, Non-Hispanic	#N/A	#N/A	#N/A	#N/A	#N/A	0	#N/A	#N/A	#N/A	#N/A	#N/A	#N/A	#N/A	#N/A	#N/A	#N/A	#N/A	2	0	0	0	0	0	0	#N/A	#N/A	#N/A	#N/A	#N/A	#N/A	1	0
F-003	F	0	Healthcare Worker*	Healthcare	0	0	1	0	2	45 - 64 years	Asian	#N/A	#N/A	#N/A	#N/A	#N/A	0	#N/A	#N/A	#N/A	#N/A	#N/A	#N/A	#N/A	#N/A	#N/A	#N/A	#N/A	0	0	0	1	0	1	0	#N/A	#N/A	#N/A	#N/A	#N/A	#N/A	1	0
F-004	F	0	Healthcare Worker*	Healthcare	0	0	1	0	2	18 - 44 years	Hispanic/Latino	#N/A	#N/A	#N/A	#N/A	#N/A	0	#N/A	#N/A	#N/A	#N/A	#N/A	#N/A	#N/A	#N/A	#N/A	#N/A	#N/A	0	0	1	1	0	1	0	0	1	0	1	1	0	1	1
F-005	F	0	Healthcare Worker*	Healthcare	0	0	1	0	2	#N/A	Asian	#N/A	#N/A	#N/A	#N/A	#N/A	0	#N/A	#N/A	#N/A	#N/A	#N/A	#N/A	#N/A	#N/A	#N/A	#N/A	#N/A	0	1	1	1	0	0	1	#N/A	#N/A	#N/A	#N/A	#N/A	#N/A	1	0
F-006	F	0	Healthcare Worker*	Healthcare	0	0	1	0	1	18 - 44 years	Hispanic/Latino	#N/A	#N/A	#N/A	#N/A	#N/A	0	#N/A	#N/A	#N/A	#N/A	#N/A	#N/A	#N/A	#N/A	#N/A	#N/A	#N/A	0	0	0	1	0	0	0	#N/A	#N/A	#N/A	#N/A	#N/A	#N/A	1	0
F-007	F	0	Healthcare Worker*	Healthcare	0	0	1	1	2	18 - 44 years	Asian	#N/A	#N/A	#N/A	#N/A	#N/A	0	#N/A	#N/A	#N/A	#N/A	#N/A	#N/A	#N/A	#N/A	#N/A	#N/A	#N/A	0	1	1	1	0	0	1	#N/A	#N/A	#N/A	#N/A	#N/A	#N/A	1	0
F-008	F	1	Household	Private Home	0	1	1	1	1	65+ years	#N/A	2	1	1	0	0	1	#N/A	#N/A	#N/A	#N/A	#N/A	#N/A	#N/A	#N/A	#N/A	#N/A	#N/A	#N/A	#N/A	#N/A	#N/A	#N/A	#N/A	#N/A	#N/A	#N/A	#N/A	#N/A	#N/A	#N/A	#N/A	#N/A
F-009	F	0	Healthcare Worker*	Healthcare	0	0	1	0	2	18 - 44 years	Hispanic/Latino	#N/A	#N/A	#N/A	#N/A	#N/A	0	#N/A	#N/A	#N/A	#N/A	#N/A	#N/A	#N/A	#N/A	#N/A	#N/A	#N/A	#N/A	#N/A	#N/A	#N/A	#N/A	#N/A	#N/A	#N/A	#N/A	#N/A	#N/A	#N/A	#N/A	0	0
F-010	F	0	Healthcare Worker*	Healthcare	0	0	1	0	2	18 - 44 years	Asian	#N/A	#N/A	#N/A	#N/A	#N/A	0	#N/A	#N/A	#N/A	#N/A	#N/A	#N/A	#N/A	#N/A	#N/A	#N/A	#N/A	2	0	0	0	0	0	0	2	0	0	0	0	0	1	1
F-011	F	0	Healthcare Worker*	Healthcare	0	0	1	0	2	45 - 64 years	Asian	#N/A	#N/A	#N/A	#N/A	#N/A	0	#N/A	#N/A	#N/A	#N/A	#N/A	#N/A	#N/A	#N/A	#N/A	#N/A	#N/A	0	0	0	0	0	0	0	#N/A	#N/A	#N/A	#N/A	#N/A	#N/A	1	0
F-012	F	0	Healthcare Worker*	Healthcare	0	0	1	0	#N/A	18 - 44 years	Hispanic/Latino	#N/A	#N/A	#N/A	#N/A	#N/A	0	#N/A	#N/A	#N/A	#N/A	#N/A	#N/A	#N/A	#N/A	#N/A	#N/A	#N/A	2	0	0	0	0	0	0	#N/A	#N/A	#N/A	#N/A	#N/A	#N/A	1	0
F-013	F	0	Healthcare Worker*	Healthcare	0	0	1	0	2	18 - 44 years	Hispanic/Latino	#N/A	#N/A	#N/A	#N/A	#N/A	0	#N/A	#N/A	#N/A	#N/A	#N/A	#N/A	#N/A	#N/A	#N/A	#N/A	#N/A	2	0	0	0	0	0	0	#N/A	#N/A	#N/A	#N/A	#N/A	#N/A	1	0
F-014	F	1	Healthcare Worker*	Healthcare	0	0	1	0	2	18 - 44 years	Hispanic/Latino	#N/A	#N/A	#N/A	#N/A	#N/A	0	#N/A	#N/A	#N/A	#N/A	#N/A	#N/A	#N/A	#N/A	#N/A	#N/A	#N/A	0	0	1	1	0	0	1	#N/A	#N/A	#N/A	#N/A	#N/A	#N/A	1	0
F-015	F	0	Healthcare Worker*	Healthcare	0	0	1	0	2	45 - 64 years	Asian	#N/A	#N/A	#N/A	#N/A	#N/A	0	#N/A	#N/A	#N/A	#N/A	#N/A	#N/A	#N/A	#N/A	#N/A	#N/A	#N/A	2	0	0	0	0	0	0	#N/A	#N/A	#N/A	#N/A	#N/A	#N/A	1	0
F-016	F	0	Healthcare Worker*	Healthcare	0	0	0	0	2	18 - 44 years	Hispanic/Latino	#N/A	#N/A	#N/A	#N/A	#N/A	0	#N/A	#N/A	#N/A	#N/A	#N/A	#N/A	#N/A	#N/A	#N/A	#N/A	#N/A	0	0	1	1	0	1	0	#N/A	#N/A	#N/A	#N/A	#N/A	#N/A	1	0
F-017	F	0	Healthcare Worker*	Healthcare	0	0	1	0	2	18 - 44 years	Asian	#N/A	#N/A	#N/A	#N/A	#N/A	0	#N/A	#N/A	#N/A	#N/A	#N/A	#N/A	#N/A	#N/A	#N/A	#N/A	#N/A	0	0	1	1	0	1	0	#N/A	#N/A	#N/A	#N/A	#N/A	#N/A	1	0
F-018	F	0	Healthcare Worker*	Healthcare	0	0	1	0	1	18 - 44 years	Asian	#N/A	#N/A	#N/A	#N/A	#N/A	0	#N/A	#N/A	#N/A	#N/A	#N/A	#N/A	#N/A	#N/A	#N/A	#N/A	#N/A	0	0	0	1	0	0	0	#N/A	#N/A	#N/A	#N/A	#N/A	#N/A	1	0
F-019	F	1	Healthcare Worker*	Healthcare	0	0	1	1	2	18 - 44 years	Hispanic/Latino	#N/A	#N/A	#N/A	#N/A	#N/A	0	#N/A	#N/A	#N/A	#N/A	#N/A	#N/A	#N/A	#N/A	#N/A	#N/A	#N/A	0	0	1	1	0	1	0	#N/A	#N/A	#N/A	#N/A	#N/A	#N/A	1	0
F-020	F	0	Healthcare Worker*	Healthcare	0	0	1	0	2	45 - 64 years	Asian	#N/A	#N/A	#N/A	#N/A	#N/A	0	#N/A	#N/A	#N/A	#N/A	#N/A	#N/A	#N/A	#N/A	#N/A	#N/A	#N/A	2	0	0	0	0	0	0	#N/A	#N/A	#N/A	#N/A	#N/A	#N/A	1	0
F-021	F	0	Healthcare Worker*	Healthcare	0	0	1	0	2	18 - 44 years	White, Non-Hispanic	#N/A	#N/A	#N/A	#N/A	#N/A	0	#N/A	#N/A	#N/A	#N/A	#N/A	#N/A	#N/A	#N/A	#N/A	#N/A	#N/A	0	0	1	1	0	0	0	#N/A	#N/A	#N/A	#N/A	#N/A	#N/A	1	0
F-022	F	0	Healthcare Worker*	Healthcare	0	0	1	0	2	18 - 44 years	White, Non-Hispanic	#N/A	#N/A	#N/A	#N/A	#N/A	0	#N/A	#N/A	#N/A	#N/A	#N/A	#N/A	#N/A	#N/A	#N/A	#N/A	#N/A	#N/A	#N/A	#N/A	#N/A	#N/A	#N/A	#N/A	#N/A	#N/A	#N/A	#N/A	#N/A	#N/A	0	0
F-023	F	0	Healthcare Worker*	Healthcare	0	0	1	0	1	18 - 44 years	Asian	#N/A	#N/A	#N/A	#N/A	#N/A	0	#N/A	#N/A	#N/A	#N/A	#N/A	#N/A	#N/A	#N/A	#N/A	#N/A	#N/A	0	1	1	1	0	0	1	#N/A	#N/A	#N/A	#N/A	#N/A	#N/A	1	0
F-024	F	0	Healthcare Worker*	Healthcare	0	0	1	0	1	18 - 44 years	White, Non-Hispanic	#N/A	#N/A	#N/A	#N/A	#N/A	0	#N/A	#N/A	#N/A	#N/A	#N/A	#N/A	#N/A	#N/A	#N/A	#N/A	#N/A	2	0	0	0	0	0	0	#N/A	#N/A	#N/A	#N/A	#N/A	#N/A	1	0
F-025	F	0	Healthcare Worker*	Healthcare	0	0	1	0	2	45 - 64 years	White, Non-Hispanic	#N/A	#N/A	#N/A	#N/A	#N/A	0	#N/A	#N/A	#N/A	#N/A	#N/A	#N/A	#N/A	#N/A	#N/A	#N/A	#N/A	0	0	1	1	0	1	0	#N/A	#N/A	#N/A	#N/A	#N/A	#N/A	1	0
F-026	F	0	Healthcare Worker*	Healthcare	0	0	1	0	2	18 - 44 years	White, Non-Hispanic	#N/A	#N/A	#N/A	#N/A	#N/A	0	#N/A	#N/A	#N/A	#N/A	#N/A	#N/A	#N/A	#N/A	#N/A	#N/A	#N/A	0	0	1	1	0	1	0	#N/A	#N/A	#N/A	#N/A	#N/A	#N/A	1	0
F-027	F	0	Healthcare Worker*	Healthcare	0	0	1	0	2	#N/A	White, Non-Hispanic	#N/A	#N/A	#N/A	#N/A	#N/A	0	#N/A	#N/A	#N/A	#N/A	#N/A	#N/A	#N/A	#N/A	#N/A	#N/A	#N/A	2	0	0	0	0	0	0	#N/A	#N/A	#N/A	#N/A	#N/A	#N/A	1	0
F-028	F	0	Healthcare Worker*	Healthcare	0	0	1	0	2	45 - 64 years	White, Non-Hispanic	#N/A	#N/A	#N/A	#N/A	#N/A	0	#N/A	#N/A	#N/A	#N/A	#N/A	#N/A	#N/A	#N/A	#N/A	#N/A	#N/A	#N/A	#N/A	#N/A	#N/A	#N/A	#N/A	#N/A	#N/A	#N/A	#N/A	#N/A	#N/A	#N/A	0	0
F-029	F	0	Healthcare Worker*	Healthcare	0	0	1	0	2	18 - 44 years	White, Non-Hispanic	#N/A	#N/A	#N/A	#N/A	#N/A	0	#N/A	#N/A	#N/A	#N/A	#N/A	#N/A	#N/A	#N/A	#N/A	#N/A	#N/A	2	0	0	0	0	0	0	#N/A	#N/A	#N/A	#N/A	#N/A	#N/A	1	0
F-030	F	1	Healthcare Worker*	Healthcare	0	0	1	0	2	18 - 44 years	White, Non-Hispanic	#N/A	#N/A	#N/A	#N/A	#N/A	0	#N/A	#N/A	#N/A	#N/A	#N/A	#N/A	#N/A	#N/A	#N/A	#N/A	#N/A	#N/A	#N/A	#N/A	#N/A	#N/A	#N/A	#N/A	#N/A	#N/A	#N/A	#N/A	#N/A	#N/A	0	0
F-031	F	0	Healthcare Worker*	Healthcare	0	0	1	0	1	45 - 64 years	Asian	#N/A	#N/A	#N/A	#N/A	#N/A	0	#N/A	#N/A	#N/A	#N/A	#N/A	#N/A	#N/A	#N/A	#N/A	#N/A	#N/A	2	0	0	0	0	0	0	#N/A	#N/A	#N/A	#N/A	#N/A	#N/A	1	0
F-032	F	0	Healthcare Worker*	Healthcare	0	0	1	0	2	18 - 44 years	Asian	#N/A	#N/A	#N/A	#N/A	#N/A	0	#N/A	#N/A	#N/A	#N/A	#N/A	#N/A	#N/A	#N/A	#N/A	#N/A	#N/A	2	0	0	0	0	0	0	2	0	0	0	0	0	1	1
F-033	F	0	Healthcare Worker*	Healthcare	0	0	1	0	2	45 - 64 years	Asian	#N/A	#N/A	#N/A	#N/A	#N/A	0	#N/A	#N/A	#N/A	#N/A	#N/A	#N/A	#N/A	#N/A	#N/A	#N/A	#N/A	2	0	0	0	0	0	0	#N/A	#N/A	#N/A	#N/A	#N/A	#N/A	1	0
F-034	F	0	Healthcare Worker*	Healthcare	0	0	1	0	#N/A	#N/A	White, Non-Hispanic	#N/A	#N/A	#N/A	#N/A	#N/A	0	#N/A	#N/A	#N/A	#N/A	#N/A	#N/A	#N/A	#N/A	#N/A	#N/A	#N/A	0	0	1	1	0	1	0	#N/A	#N/A	#N/A	#N/A	#N/A	#N/A	1	0
F-035	F	1	Healthcare Worker*	Healthcare	0	0	1	1	1	45 - 64 years	Asian	#N/A	#N/A	#N/A	#N/A	#N/A	0	#N/A	#N/A	#N/A	#N/A	#N/A	#N/A	#N/A	#N/A	#N/A	#N/A	#N/A	0	1	1	1	0	0	1	#N/A	#N/A	#N/A	#N/A	#N/A	#N/A	1	0
F-036	F	0	Healthcare Worker*	Healthcare	0	0	1	0	2	65+ years	White, Non-Hispanic	#N/A	#N/A	#N/A	#N/A	#N/A	0	#N/A	#N/A	#N/A	#N/A	#N/A	#N/A	#N/A	#N/A	#N/A	#N/A	#N/A	#N/A	#N/A	#N/A	#N/A	#N/A	#N/A	#N/A	#N/A	#N/A	#N/A	#N/A	#N/A	#N/A	0	0
F-037	F	0	Healthcare Worker*	Healthcare	0	0	1	0	1	18 - 44 years	White, Non-Hispanic	#N/A	#N/A	#N/A	#N/A	#N/A	0	#N/A	#N/A	#N/A	#N/A	#N/A	#N/A	#N/A	#N/A	#N/A	#N/A	#N/A	#N/A	#N/A	#N/A	#N/A	#N/A	#N/A	#N/A	#N/A	#N/A	#N/A	#N/A	#N/A	#N/A	0	0
F-038	F	0	Healthcare Worker*	Healthcare	0	0	1	0	2	18 - 44 years	White, Non-Hispanic	#N/A	#N/A	#N/A	#N/A	#N/A	0	#N/A	#N/A	#N/A	#N/A	#N/A	#N/A	#N/A	#N/A	#N/A	#N/A	#N/A	2	0	0	0	0	0	0	#N/A	#N/A	#N/A	#N/A	#N/A	#N/A	1	0
F-039	F	0	Healthcare Worker*	Healthcare	0	0	1	0	2	18 - 44 years	White, Non-Hispanic	#N/A	#N/A	#N/A	#N/A	#N/A	0	#N/A	#N/A	#N/A	#N/A	#N/A	#N/A	#N/A	#N/A	#N/A	#N/A	#N/A	#N/A	#N/A	#N/A	#N/A	#N/A	#N/A	#N/A	#N/A	#N/A	#N/A	#N/A	#N/A	#N/A	0	0
F-040	F	0	Healthcare Worker*	Healthcare	0	0	1	0	2	45 - 64 years	Hispanic/Latino	#N/A	#N/A	#N/A	#N/A	#N/A	0	#N/A	#N/A	#N/A	#N/A	#N/A	#N/A	#N/A	#N/A	#N/A	#N/A	#N/A	#N/A	#N/A	#N/A	#N/A	#N/A	#N/A	#N/A	#N/A	#N/A	#N/A	#N/A	#N/A	#N/A	0	0
F-041	F	0	Healthcare Worker*	Healthcare	0	0	1	0	2	18 - 44 years	White, Non-Hispanic	#N/A	#N/A	#N/A	#N/A	#N/A	0	#N/A	#N/A	#N/A	#N/A	#N/A	#N/A	#N/A	#N/A	#N/A	#N/A	#N/A	#N/A	#N/A	#N/A	#N/A	#N/A	#N/A	#N/A	#N/A	#N/A	#N/A	#N/A	#N/A	#N/A	0	0
F-042	F	0	Healthcare Worker*	Healthcare	0	0	1	0	2	18 - 44 years	Hispanic/Latino	#N/A	#N/A	#N/A	#N/A	#N/A	0	#N/A	#N/A	#N/A	#N/A	#N/A	#N/A	#N/A	#N/A	#N/A	#N/A	#N/A	#N/A	#N/A	#N/A	#N/A	#N/A	#N/A	#N/A	#N/A	#N/A	#N/A	#N/A	#N/A	#N/A	0	0
F-043	F	1	Healthcare Worker*	Healthcare	0	0	1	0	2	18 - 44 years	#N/A	#N/A	#N/A	#N/A	#N/A	#N/A	0	#N/A	#N/A	#N/A	#N/A	#N/A	#N/A	#N/A	#N/A	#N/A	#N/A	#N/A	#N/A	#N/A	#N/A	#N/A	#N/A	#N/A	#N/A	#N/A	#N/A	#N/A	#N/A	#N/A	#N/A	0	0
F-044	F	0	Healthcare Worker*	Healthcare	0	0	1	0	2	18 - 44 years	Black, Non-Hispanic	#N/A	#N/A	#N/A	#N/A	#N/A	0	#N/A	#N/A	#N/A	#N/A	#N/A	#N/A	#N/A	#N/A	#N/A	#N/A	#N/A	#N/A	#N/A	#N/A	#N/A	#N/A	#N/A	#N/A	#N/A	#N/A	#N/A	#N/A	#N/A	#N/A	0	0
F-046	F	1	Healthcare Worker*	Healthcare	0	0	1	0	1	18 - 44 years	Hispanic/Latino	#N/A	#N/A	#N/A	0	#N/A	0	#N/A	#N/A	#N/A	#N/A	#N/A	#N/A	#N/A	#N/A	#N/A	#N/A	#N/A	2	0	0	0	0	0	0	#N/A	#N/A	#N/A	#N/A	#N/A	#N/A	1	0
F-049	F	0	Healthcare Worker*	Healthcare	0	0	1	0	2	18 - 44 years	White, Non-Hispanic	#N/A	#N/A	#N/A	#N/A	#N/A	0	#N/A	#N/A	#N/A	#N/A	#N/A	#N/A	#N/A	#N/A	#N/A	#N/A	#N/A	#N/A	#N/A	#N/A	#N/A	#N/A	#N/A	#N/A	#N/A	#N/A	#N/A	#N/A	#N/A	#N/A	0	0
F-061	F	0	Healthcare Worker*	Healthcare	0	0	1	0	2	45 - 64 years	Asian	#N/A	#N/A	#N/A	#N/A	#N/A	0	#N/A	#N/A	#N/A	#N/A	#N/A	#N/A	#N/A	#N/A	#N/A	#N/A	#N/A	2	0	0	0	0	0	0	#N/A	#N/A	#N/A	#N/A	#N/A	#N/A	1	0
F-062	F	0	Healthcare Worker*	Healthcare	0	0	1	0	2	18 - 44 years	White, Non-Hispanic	#N/A	#N/A	#N/A	#N/A	#N/A	0	#N/A	#N/A	#N/A	#N/A	#N/A	#N/A	#N/A	#N/A	#N/A	#N/A	#N/A	#N/A	#N/A	#N/A	#N/A	#N/A	#N/A	#N/A	#N/A	#N/A	#N/A	#N/A	#N/A	#N/A	0	0
F-065	F	0	Healthcare Worker*	Healthcare	0	0	1	1	2	18 - 44 years	Hispanic/Latino	#N/A	#N/A	#N/A	#N/A	#N/A	0	#N/A	#N/A	#N/A	#N/A	#N/A	#N/A	#N/A	#N/A	#N/A	#N/A	#N/A	0	0	0	1	0	0	0	#N/A	#N/A	#N/A	#N/A	#N/A	#N/A	1	0
F-066	F	1	Healthcare Worker*	Healthcare	0	0	1	0	2	18 - 44 years	White, Non-Hispanic	#N/A	0	0	0	#N/A	0	#N/A	#N/A	#N/A	#N/A	#N/A	#N/A	#N/A	#N/A	#N/A	#N/A	#N/A	0	0	1	1	0	0	1	#N/A	#N/A	#N/A	#N/A	#N/A	#N/A	1	0
F-067	F	1	Healthcare Worker*	Healthcare	0	0	1	0	2	18 - 44 years	#N/A	#N/A	#N/A	#N/A	#N/A	#N/A	0	#N/A	#N/A	#N/A	#N/A	#N/A	#N/A	#N/A	#N/A	#N/A	#N/A	#N/A	#N/A	#N/A	#N/A	#N/A	#N/A	#N/A	#N/A	#N/A	#N/A	#N/A	#N/A	#N/A	#N/A	0	0
F-068	F	1	Healthcare Worker*	Healthcare	0	0	1	0	2	18 - 44 years	#N/A	#N/A	#N/A	#N/A	#N/A	#N/A	0	#N/A	#N/A	#N/A	#N/A	#N/A	#N/A	#N/A	#N/A	#N/A	#N/A	#N/A	#N/A	#N/A	#N/A	#N/A	#N/A	#N/A	#N/A	#N/A	#N/A	#N/A	#N/A	#N/A	#N/A	0	0
F-069	F	1	Healthcare Worker*	Healthcare	0	0	1	0	2	18 - 44 years	Hispanic/Latino	#N/A	#N/A	#N/A	#N/A	#N/A	0	#N/A	#N/A	#N/A	#N/A	#N/A	#N/A	#N/A	#N/A	#N/A	#N/A	#N/A	0	0	1	1	0	0	1	#N/A	#N/A	#N/A	#N/A	#N/A	#N/A	1	0
F-070	F	1	Healthcare Worker*	Healthcare	0	0	1	0	2	18 - 44 years	Asian	#N/A	#N/A	#N/A	#N/A	#N/A	0	#N/A	#N/A	#N/A	#N/A	#N/A	#N/A	#N/A	#N/A	#N/A	#N/A	#N/A	#N/A	#N/A	#N/A	#N/A	#N/A	#N/A	#N/A	#N/A	#N/A	#N/A	#N/A	#N/A	#N/A	0	0
F-071	F	1	Healthcare Worker*	Healthcare	0	0	1	0	2	18 - 44 years	#N/A	#N/A	#N/A	#N/A	#N/A	#N/A	0	#N/A	#N/A	#N/A	#N/A	#N/A	#N/A	#N/A	#N/A	#N/A	#N/A	#N/A	#N/A	#N/A	#N/A	#N/A	#N/A	#N/A	#N/A	#N/A	#N/A	#N/A	#N/A	#N/A	#N/A	0	0
F-072	F	1	Healthcare Worker*	Healthcare	0	0	1	0	2	18 - 44 years	White, Non-Hispanic	#N/A	#N/A	#N/A	#N/A	#N/A	0	#N/A	#N/A	#N/A	#N/A	#N/A	#N/A	#N/A	#N/A	#N/A	#N/A	#N/A	0	1	1	1	0	0	1	#N/A	#N/A	#N/A	#N/A	#N/A	#N/A	1	0
F-074	F	1	Healthcare Worker*	Healthcare	0	0	1	0	2	18 - 44 years	White, Non-Hispanic	#N/A	#N/A	#N/A	#N/A	#N/A	0	#N/A	#N/A	#N/A	#N/A	#N/A	#N/A	#N/A	#N/A	#N/A	#N/A	#N/A	#N/A	#N/A	#N/A	#N/A	#N/A	#N/A	#N/A	#N/A	#N/A	#N/A	#N/A	#N/A	#N/A	0	0
F-075	F	1	Healthcare Worker*	Healthcare	0	0	1	0	2	18 - 44 years	White, Non-Hispanic	#N/A	#N/A	#N/A	#N/A	#N/A	0	#N/A	#N/A	#N/A	#N/A	#N/A	#N/A	#N/A	#N/A	#N/A	#N/A	#N/A	#N/A	#N/A	#N/A	#N/A	#N/A	#N/A	#N/A	#N/A	#N/A	#N/A	#N/A	#N/A	#N/A	0	0
F-076	F	1	Healthcare Worker*	Healthcare	0	0	1	0	2	45 - 64 years	Hispanic/Latino	#N/A	#N/A	#N/A	#N/A	#N/A	0	1	#N/A	0	0	0	#N/A	#N/A	#N/A	#N/A	1	#N/A	0	0	1	1	0	0	1	#N/A	#N/A	#N/A	#N/A	#N/A	#N/A	1	0
F-077	F	1	Community - Healthcare Setting	Healthcare	0	0	1	0	2	18 - 44 years	Hispanic/Latino	#N/A	#N/A	#N/A	#N/A	#N/A	0	#N/A	#N/A	#N/A	#N/A	#N/A	#N/A	#N/A	#N/A	#N/A	#N/A	#N/A	#N/A	#N/A	#N/A	#N/A	#N/A	#N/A	#N/A	#N/A	#N/A	#N/A	#N/A	#N/A	#N/A	#N/A	#N/A
F-078	F	1	Community - Healthcare Setting	Healthcare	0	0	1	0	2	18 - 44 years	Hispanic/Latino	#N/A	#N/A	#N/A	#N/A	#N/A	0	#N/A	#N/A	#N/A	#N/A	#N/A	#N/A	#N/A	#N/A	#N/A	#N/A	#N/A	#N/A	#N/A	#N/A	#N/A	#N/A	#N/A	#N/A	#N/A	#N/A	#N/A	#N/A	#N/A	#N/A	#N/A	#N/A
F-079	F	1	Community - Healthcare Setting	Healthcare	0	0	1	0	1	18 - 44 years	#N/A	#N/A	#N/A	#N/A	#N/A	#N/A	0	#N/A	#N/A	#N/A	#N/A	#N/A	#N/A	#N/A	#N/A	#N/A	#N/A	#N/A	#N/A	#N/A	#N/A	#N/A	#N/A	#N/A	#N/A	#N/A	#N/A	#N/A	#N/A	#N/A	#N/A	#N/A	#N/A
F-089	F	1	Healthcare Worker*	Healthcare	0	0	1	0	2	18 - 44 years	Asian	#N/A	#N/A	#N/A	#N/A	#N/A	0	#N/A	#N/A	#N/A	#N/A	#N/A	#N/A	#N/A	#N/A	#N/A	#N/A	#N/A	#N/A	#N/A	#N/A	#N/A	#N/A	#N/A	#N/A	#N/A	#N/A	#N/A	#N/A	#N/A	#N/A	0	0
F-090	F	0	Healthcare Worker*	Healthcare	0	0	0	0	#N/A	#N/A	White, Non-Hispanic	#N/A	#N/A	#N/A	#N/A	#N/A	0	#N/A	#N/A	#N/A	#N/A	#N/A	#N/A	#N/A	#N/A	#N/A	#N/A	#N/A	#N/A	#N/A	#N/A	#N/A	#N/A	#N/A	#N/A	#N/A	#N/A	#N/A	#N/A	#N/A	#N/A	0	0
F-091	F	0	Healthcare Worker*	Healthcare	0	0	0	0	2	45 - 64 years	Asian	#N/A	#N/A	#N/A	#N/A	#N/A	0	#N/A	#N/A	#N/A	#N/A	#N/A	#N/A	#N/A	#N/A	#N/A	#N/A	#N/A	0	0	1	1	0	1	0	0	1	0	1	1	0	1	1
F-092	F	0	Healthcare Worker*	Healthcare	0	0	0	0	1	45 - 64 years	White, Non-Hispanic	#N/A	#N/A	#N/A	#N/A	#N/A	0	#N/A	#N/A	#N/A	#N/A	#N/A	#N/A	#N/A	#N/A	#N/A	#N/A	#N/A	0	0	1	1	0	0	1	#N/A	#N/A	#N/A	#N/A	#N/A	#N/A	1	0
F-093	F	0	Healthcare Worker*	Healthcare	0	0	0	0	#N/A	45 - 64 years	White, Non-Hispanic	#N/A	#N/A	#N/A	#N/A	#N/A	0	#N/A	#N/A	#N/A	#N/A	#N/A	#N/A	#N/A	#N/A	#N/A	#N/A	#N/A	2	0	0	0	0	0	0	#N/A	#N/A	#N/A	#N/A	#N/A	#N/A	1	0
F-094	F	0	Healthcare Worker*	Healthcare	0	0	0	0	2	18 - 44 years	Hispanic/Latino	#N/A	#N/A	#N/A	#N/A	#N/A	0	#N/A	#N/A	#N/A	#N/A	#N/A	#N/A	#N/A	#N/A	#N/A	#N/A	#N/A	2	0	0	0	0	0	0	#N/A	#N/A	#N/A	#N/A	#N/A	#N/A	1	0
F-095	F	0	Healthcare Worker*	Healthcare	0	0	0	0	2	18 - 44 years	White, Non-Hispanic	#N/A	#N/A	#N/A	#N/A	#N/A	0	#N/A	#N/A	#N/A	#N/A	#N/A	#N/A	#N/A	#N/A	#N/A	#N/A	#N/A	#N/A	#N/A	#N/A	#N/A	#N/A	#N/A	#N/A	#N/A	#N/A	#N/A	#N/A	#N/A	#N/A	0	0
F-096	F	0	Healthcare Worker*	Healthcare	0	0	0	0	1	18 - 44 years	Hispanic/Latino	#N/A	#N/A	#N/A	#N/A	#N/A	0	#N/A	#N/A	#N/A	#N/A	#N/A	#N/A	#N/A	#N/A	#N/A	#N/A	#N/A	#N/A	#N/A	#N/A	#N/A	#N/A	#N/A	#N/A	#N/A	#N/A	#N/A	#N/A	#N/A	#N/A	0	0
F-097	F	0	Healthcare Worker*	Healthcare	0	0	0	0	2	45 - 64 years	Asian	#N/A	#N/A	#N/A	#N/A	#N/A	0	#N/A	#N/A	#N/A	0	0	#N/A	#N/A	#N/A	#N/A	1	#N/A	2	0	0	0	0	0	0	#N/A	#N/A	#N/A	#N/A	#N/A	#N/A	1	0
F-098	F	0	Healthcare Worker*	Healthcare	0	0	0	0	#N/A	18 - 44 years	Hispanic/Latino	#N/A	#N/A	#N/A	#N/A	#N/A	0	#N/A	#N/A	#N/A	#N/A	#N/A	#N/A	#N/A	#N/A	#N/A	#N/A	#N/A	#N/A	#N/A	#N/A	#N/A	#N/A	#N/A	#N/A	#N/A	#N/A	#N/A	#N/A	#N/A	#N/A	0	0
F-099	F	0	Healthcare Worker*	Healthcare	0	0	0	0	2	18 - 44 years	White, Non-Hispanic	#N/A	#N/A	#N/A	#N/A	#N/A	0	#N/A	#N/A	#N/A	#N/A	#N/A	#N/A	#N/A	#N/A	#N/A	#N/A	#N/A	#N/A	#N/A	#N/A	#N/A	#N/A	#N/A	#N/A	#N/A	#N/A	#N/A	#N/A	#N/A	#N/A	0	0
F-100	F	0	Healthcare Worker*	Healthcare	0	0	0	0	2	45 - 64 years	White, Non-Hispanic	#N/A	#N/A	#N/A	#N/A	#N/A	0	#N/A	#N/A	#N/A	#N/A	#N/A	#N/A	#N/A	#N/A	#N/A	#N/A	#N/A	#N/A	#N/A	#N/A	#N/A	#N/A	#N/A	#N/A	#N/A	#N/A	#N/A	#N/A	#N/A	#N/A	0	0
F-101	F	0	Healthcare Worker*	Healthcare	0	0	0	0	1	45 - 64 years	White, Non-Hispanic	#N/A	#N/A	#N/A	#N/A	#N/A	0	#N/A	#N/A	#N/A	#N/A	#N/A	#N/A	#N/A	#N/A	#N/A	#N/A	#N/A	#N/A	#N/A	#N/A	#N/A	#N/A	#N/A	#N/A	#N/A	#N/A	#N/A	#N/A	#N/A	#N/A	0	0
F-102	F	0	Healthcare Worker*	Healthcare	0	0	0	0	#N/A	18 - 44 years	Hispanic/Latino	#N/A	#N/A	#N/A	#N/A	#N/A	0	#N/A	#N/A	#N/A	#N/A	#N/A	#N/A	#N/A	#N/A	#N/A	#N/A	#N/A	#N/A	#N/A	#N/A	#N/A	#N/A	#N/A	#N/A	#N/A	#N/A	#N/A	#N/A	#N/A	#N/A	0	0
F-103	F	0	Healthcare Worker*	Healthcare	0	0	0	0	2	18 - 44 years	White, Non-Hispanic	#N/A	#N/A	#N/A	#N/A	#N/A	0	#N/A	#N/A	#N/A	#N/A	#N/A	#N/A	#N/A	#N/A	#N/A	#N/A	#N/A	#N/A	#N/A	#N/A	#N/A	#N/A	#N/A	#N/A	#N/A	#N/A	#N/A	#N/A	#N/A	#N/A	0	0
F-104	F	0	Healthcare Worker*	Healthcare	0	0	0	0	2	18 - 44 years	Hispanic/Latino	#N/A	#N/A	#N/A	#N/A	#N/A	0	#N/A	#N/A	#N/A	#N/A	#N/A	#N/A	#N/A	#N/A	#N/A	#N/A	#N/A	#N/A	#N/A	#N/A	#N/A	#N/A	#N/A	#N/A	#N/A	#N/A	#N/A	#N/A	#N/A	#N/A	0	0
F-105	F	0	Healthcare Worker*	Healthcare	0	0	0	0	#N/A	18 - 44 years	White, Non-Hispanic	#N/A	#N/A	#N/A	#N/A	#N/A	0	0	#N/A	0	0	0	#N/A	#N/A	#N/A	0	0	#N/A	#N/A	#N/A	#N/A	#N/A	#N/A	#N/A	#N/A	#N/A	#N/A	#N/A	#N/A	#N/A	#N/A	0	0
F-106	F	0	Community - Healthcare Setting	Healthcare	0	0	0	0	#N/A	18 - 44 years	#N/A	#N/A	#N/A	#N/A	#N/A	#N/A	0	#N/A	#N/A	#N/A	#N/A	#N/A	#N/A	#N/A	#N/A	#N/A	#N/A	#N/A	#N/A	#N/A	#N/A	#N/A	#N/A	#N/A	#N/A	#N/A	#N/A	#N/A	#N/A	#N/A	#N/A	#N/A	#N/A
F-107	F	0	Community - Healthcare Setting	Healthcare	0	0	0	0	#N/A	18 - 44 years	#N/A	#N/A	#N/A	#N/A	#N/A	#N/A	0	#N/A	#N/A	#N/A	#N/A	#N/A	#N/A	#N/A	#N/A	#N/A	#N/A	#N/A	#N/A	#N/A	#N/A	#N/A	#N/A	#N/A	#N/A	#N/A	#N/A	#N/A	#N/A	#N/A	#N/A	#N/A	#N/A
F-108	F	0	Community - Healthcare Setting	Healthcare	0	0	0	0	#N/A	#N/A	#N/A	#N/A	#N/A	#N/A	#N/A	#N/A	0	#N/A	#N/A	#N/A	#N/A	#N/A	#N/A	#N/A	#N/A	#N/A	#N/A	#N/A	#N/A	#N/A	#N/A	#N/A	#N/A	#N/A	#N/A	#N/A	#N/A	#N/A	#N/A	#N/A	#N/A	#N/A	#N/A
F-109	F	0	Community - Healthcare Setting	Healthcare	0	0	0	0	#N/A	#N/A	#N/A	#N/A	#N/A	#N/A	#N/A	#N/A	0	#N/A	#N/A	#N/A	#N/A	#N/A	#N/A	#N/A	#N/A	#N/A	#N/A	#N/A	#N/A	#N/A	#N/A	#N/A	#N/A	#N/A	#N/A	#N/A	#N/A	#N/A	#N/A	#N/A	#N/A	#N/A	#N/A
F-110	F	0	Community - Healthcare Setting	Healthcare	0	0	0	0	2	#N/A	#N/A	#N/A	#N/A	#N/A	#N/A	#N/A	0	#N/A	#N/A	#N/A	#N/A	#N/A	#N/A	#N/A	#N/A	#N/A	#N/A	#N/A	#N/A	#N/A	#N/A	#N/A	#N/A	#N/A	#N/A	#N/A	#N/A	#N/A	#N/A	#N/A	#N/A	#N/A	#N/A
F-111	F	0	Community - Healthcare Setting	Healthcare	0	0	0	0	2	#N/A	#N/A	#N/A	#N/A	#N/A	#N/A	#N/A	0	#N/A	#N/A	#N/A	#N/A	#N/A	#N/A	#N/A	#N/A	#N/A	#N/A	#N/A	#N/A	#N/A	#N/A	#N/A	#N/A	#N/A	#N/A	#N/A	#N/A	#N/A	#N/A	#N/A	#N/A	#N/A	#N/A
F-112	F	0	Community - Healthcare Setting	Healthcare	0	0	0	0	#N/A	10 - 18 years	#N/A	#N/A	#N/A	#N/A	#N/A	#N/A	0	#N/A	#N/A	#N/A	#N/A	#N/A	#N/A	#N/A	#N/A	#N/A	#N/A	#N/A	#N/A	#N/A	#N/A	#N/A	#N/A	#N/A	#N/A	#N/A	#N/A	#N/A	#N/A	#N/A	#N/A	#N/A	#N/A
F-113	F	0	Community - Healthcare Setting	Healthcare	0	0	0	0	#N/A	10 - 18 years	#N/A	#N/A	#N/A	#N/A	#N/A	#N/A	0	#N/A	#N/A	#N/A	#N/A	#N/A	#N/A	#N/A	#N/A	#N/A	#N/A	#N/A	#N/A	#N/A	#N/A	#N/A	#N/A	#N/A	#N/A	#N/A	#N/A	#N/A	#N/A	#N/A	#N/A	#N/A	#N/A
F-114	F	0	Community - Healthcare Setting	Healthcare	0	0	0	0	1	45 - 64 years	#N/A	#N/A	#N/A	#N/A	#N/A	#N/A	0	#N/A	#N/A	#N/A	#N/A	#N/A	#N/A	#N/A	#N/A	#N/A	#N/A	#N/A	#N/A	#N/A	#N/A	#N/A	#N/A	#N/A	#N/A	#N/A	#N/A	#N/A	#N/A	#N/A	#N/A	#N/A	#N/A
F-115	F	0	Community - Healthcare Setting	Healthcare	0	0	0	0	#N/A	#N/A	#N/A	#N/A	#N/A	#N/A	#N/A	#N/A	0	#N/A	#N/A	#N/A	#N/A	#N/A	#N/A	#N/A	#N/A	#N/A	#N/A	#N/A	#N/A	#N/A	#N/A	#N/A	#N/A	#N/A	#N/A	#N/A	#N/A	#N/A	#N/A	#N/A	#N/A	#N/A	#N/A
F-116	F	0	Community - Healthcare Setting	Healthcare	0	0	0	0	#N/A	#N/A	#N/A	#N/A	#N/A	#N/A	#N/A	#N/A	0	#N/A	#N/A	#N/A	#N/A	#N/A	#N/A	#N/A	#N/A	#N/A	#N/A	#N/A	#N/A	#N/A	#N/A	#N/A	#N/A	#N/A	#N/A	#N/A	#N/A	#N/A	#N/A	#N/A	#N/A	#N/A	#N/A
F-117	F	0	Community - Healthcare Setting	Healthcare	0	0	0	0	#N/A	#N/A	#N/A	#N/A	#N/A	#N/A	#N/A	#N/A	0	#N/A	#N/A	#N/A	#N/A	#N/A	#N/A	#N/A	#N/A	#N/A	#N/A	#N/A	#N/A	#N/A	#N/A	#N/A	#N/A	#N/A	#N/A	#N/A	#N/A	#N/A	#N/A	#N/A	#N/A	#N/A	#N/A
F-118	F	0	Community - Healthcare Setting	Healthcare	0	0	0	0	#N/A	#N/A	#N/A	#N/A	#N/A	#N/A	#N/A	#N/A	0	#N/A	#N/A	#N/A	#N/A	#N/A	#N/A	#N/A	#N/A	#N/A	#N/A	#N/A	#N/A	#N/A	#N/A	#N/A	#N/A	#N/A	#N/A	#N/A	#N/A	#N/A	#N/A	#N/A	#N/A	#N/A	#N/A
F-119	F	0	Community - Healthcare Setting	Healthcare	0	0	0	0	#N/A	#N/A	#N/A	#N/A	#N/A	#N/A	#N/A	#N/A	0	#N/A	#N/A	#N/A	#N/A	#N/A	#N/A	#N/A	#N/A	#N/A	#N/A	#N/A	#N/A	#N/A	#N/A	#N/A	#N/A	#N/A	#N/A	#N/A	#N/A	#N/A	#N/A	#N/A	#N/A	#N/A	#N/A
F-120	F	0	Community - Healthcare Setting	Healthcare	0	0	0	0	#N/A	#N/A	#N/A	#N/A	#N/A	#N/A	#N/A	#N/A	0	#N/A	#N/A	#N/A	#N/A	#N/A	#N/A	#N/A	#N/A	#N/A	#N/A	#N/A	#N/A	#N/A	#N/A	#N/A	#N/A	#N/A	#N/A	#N/A	#N/A	#N/A	#N/A	#N/A	#N/A	#N/A	#N/A
F-121	F	0	Community - Healthcare Setting	Healthcare	0	0	0	0	#N/A	#N/A	#N/A	#N/A	#N/A	#N/A	#N/A	#N/A	0	#N/A	#N/A	#N/A	#N/A	0	#N/A	#N/A	#N/A	#N/A	0	#N/A	#N/A	#N/A	#N/A	#N/A	#N/A	#N/A	#N/A	#N/A	#N/A	#N/A	#N/A	#N/A	#N/A	#N/A	#N/A
F-122	F	0	Community - Healthcare Setting	Healthcare	0	0	0	0	2	18 - 44 years	#N/A	#N/A	#N/A	#N/A	#N/A	#N/A	0	#N/A	#N/A	#N/A	#N/A	#N/A	#N/A	#N/A	#N/A	#N/A	#N/A	#N/A	#N/A	#N/A	#N/A	#N/A	#N/A	#N/A	#N/A	#N/A	#N/A	#N/A	#N/A	#N/A	#N/A	#N/A	#N/A
F-123	F	0	Community - Healthcare Setting	Healthcare	0	0	0	0	1	< 10 years	#N/A	#N/A	#N/A	#N/A	#N/A	#N/A	0	#N/A	#N/A	#N/A	#N/A	#N/A	#N/A	#N/A	#N/A	#N/A	#N/A	#N/A	#N/A	#N/A	#N/A	#N/A	#N/A	#N/A	#N/A	#N/A	#N/A	#N/A	#N/A	#N/A	#N/A	#N/A	#N/A
F-124	F	0	Community - Healthcare Setting	Healthcare	0	0	0	0	2	18 - 44 years	#N/A	#N/A	#N/A	#N/A	#N/A	#N/A	0	#N/A	#N/A	#N/A	#N/A	#N/A	#N/A	#N/A	#N/A	#N/A	#N/A	#N/A	#N/A	#N/A	#N/A	#N/A	#N/A	#N/A	#N/A	#N/A	#N/A	#N/A	#N/A	#N/A	#N/A	#N/A	#N/A
F-125	F	0	Community - Healthcare Setting	Healthcare	0	0	0	0	2	#N/A	Hispanic/Latino	#N/A	#N/A	#N/A	#N/A	#N/A	0	#N/A	#N/A	#N/A	#N/A	#N/A	#N/A	#N/A	#N/A	#N/A	#N/A	#N/A	#N/A	#N/A	#N/A	#N/A	#N/A	#N/A	#N/A	#N/A	#N/A	#N/A	#N/A	#N/A	#N/A	#N/A	#N/A
F-126	F	0	Community - Healthcare Setting	Healthcare	0	0	0	0	1	18 - 44 years	#N/A	#N/A	#N/A	#N/A	#N/A	#N/A	0	#N/A	#N/A	#N/A	#N/A	#N/A	#N/A	#N/A	#N/A	#N/A	#N/A	#N/A	#N/A	#N/A	#N/A	#N/A	#N/A	#N/A	#N/A	#N/A	#N/A	#N/A	#N/A	#N/A	#N/A	#N/A	#N/A
F-127	F	0	Community - Healthcare Setting	Healthcare	0	0	0	0	#N/A	#N/A	#N/A	#N/A	#N/A	#N/A	#N/A	#N/A	0	#N/A	#N/A	#N/A	#N/A	#N/A	#N/A	#N/A	#N/A	#N/A	#N/A	#N/A	#N/A	#N/A	#N/A	#N/A	#N/A	#N/A	#N/A	#N/A	#N/A	#N/A	#N/A	#N/A	#N/A	#N/A	#N/A
F-128	F	0	Community - Healthcare Setting	Healthcare	0	0	0	0	#N/A	#N/A	#N/A	#N/A	#N/A	#N/A	#N/A	#N/A	0	#N/A	#N/A	#N/A	#N/A	#N/A	#N/A	#N/A	#N/A	#N/A	#N/A	#N/A	#N/A	#N/A	#N/A	#N/A	#N/A	#N/A	#N/A	#N/A	#N/A	#N/A	#N/A	#N/A	#N/A	#N/A	#N/A
F-129	F	0	Healthcare Worker*	Healthcare	0	0	0	0	#N/A	18 - 44 years	White, Non-Hispanic	#N/A	#N/A	#N/A	#N/A	#N/A	0	#N/A	#N/A	#N/A	#N/A	#N/A	#N/A	#N/A	#N/A	#N/A	#N/A	#N/A	#N/A	#N/A	#N/A	#N/A	#N/A	#N/A	#N/A	#N/A	#N/A	#N/A	#N/A	#N/A	#N/A	0	0
F-130	F	0	Healthcare Worker*	Healthcare	0	0	0	0	2	18 - 44 years	White, Non-Hispanic	#N/A	#N/A	#N/A	#N/A	#N/A	0	#N/A	#N/A	#N/A	#N/A	#N/A	#N/A	#N/A	#N/A	#N/A	#N/A	#N/A	0	0	0	1	0	0	0	#N/A	#N/A	#N/A	#N/A	#N/A	#N/A	1	0
F-131	F	0	Healthcare Worker*	Healthcare	0	0	0	0	2	18 - 44 years	White, Non-Hispanic	#N/A	#N/A	#N/A	#N/A	#N/A	0	#N/A	#N/A	#N/A	#N/A	#N/A	#N/A	#N/A	#N/A	#N/A	#N/A	#N/A	#N/A	#N/A	#N/A	#N/A	#N/A	#N/A	#N/A	#N/A	#N/A	#N/A	#N/A	#N/A	#N/A	0	0
F-132	F	0	Healthcare Worker*	Healthcare	0	0	0	0	2	18 - 44 years	White, Non-Hispanic	#N/A	#N/A	#N/A	#N/A	#N/A	0	#N/A	#N/A	#N/A	#N/A	#N/A	#N/A	#N/A	#N/A	#N/A	#N/A	#N/A	#N/A	#N/A	#N/A	#N/A	#N/A	#N/A	#N/A	#N/A	#N/A	#N/A	#N/A	#N/A	#N/A	0	0
F-133	F	0	Healthcare Worker*	Healthcare	0	0	0	0	2	18 - 44 years	White, Non-Hispanic	#N/A	#N/A	#N/A	#N/A	#N/A	0	#N/A	#N/A	#N/A	#N/A	#N/A	#N/A	#N/A	#N/A	#N/A	#N/A	#N/A	#N/A	#N/A	#N/A	#N/A	#N/A	#N/A	#N/A	#N/A	#N/A	#N/A	#N/A	#N/A	#N/A	0	0
F-134	F	0	Community - Healthcare Setting	Healthcare	0	0	0	0	#N/A	#N/A	White, Non-Hispanic	#N/A	#N/A	#N/A	#N/A	#N/A	0	#N/A	#N/A	#N/A	#N/A	#N/A	#N/A	#N/A	#N/A	#N/A	#N/A	#N/A	#N/A	#N/A	#N/A	#N/A	#N/A	#N/A	#N/A	#N/A	#N/A	#N/A	#N/A	#N/A	#N/A	#N/A	#N/A
F-135	F	0	Healthcare Worker*	Healthcare	0	0	0	0	1	45 - 64 years	Hispanic/Latino	#N/A	#N/A	#N/A	#N/A	#N/A	0	#N/A	#N/A	#N/A	#N/A	#N/A	#N/A	#N/A	#N/A	#N/A	#N/A	#N/A	#N/A	#N/A	#N/A	#N/A	#N/A	#N/A	#N/A	#N/A	#N/A	#N/A	#N/A	#N/A	#N/A	0	0
F-136	F	0	Healthcare Worker*	Healthcare	0	0	0	0	#N/A	18 - 44 years	White, Non-Hispanic	#N/A	#N/A	#N/A	#N/A	#N/A	0	#N/A	#N/A	#N/A	#N/A	#N/A	#N/A	#N/A	#N/A	#N/A	#N/A	#N/A	1	0	0	0	0	1	0	#N/A	#N/A	#N/A	#N/A	#N/A	#N/A	1	0
F-137	F	0	Community - Healthcare Setting	Healthcare	0	0	0	0	#N/A	#N/A	#N/A	#N/A	#N/A	#N/A	#N/A	#N/A	0	#N/A	#N/A	#N/A	#N/A	#N/A	#N/A	#N/A	#N/A	#N/A	#N/A	#N/A	#N/A	#N/A	#N/A	#N/A	#N/A	#N/A	#N/A	#N/A	#N/A	#N/A	#N/A	#N/A	#N/A	#N/A	#N/A
F-138	F	0	Community - Healthcare Setting	Healthcare	0	0	0	0	2	45 - 64 years	#N/A	#N/A	#N/A	#N/A	#N/A	#N/A	0	#N/A	#N/A	#N/A	#N/A	#N/A	#N/A	#N/A	#N/A	#N/A	#N/A	#N/A	#N/A	#N/A	#N/A	#N/A	#N/A	#N/A	#N/A	#N/A	#N/A	#N/A	#N/A	#N/A	#N/A	#N/A	#N/A
F-139	F	0	Community - Healthcare Setting	Healthcare	0	0	0	0	2	18 - 44 years	#N/A	#N/A	#N/A	#N/A	#N/A	#N/A	0	#N/A	#N/A	#N/A	#N/A	#N/A	#N/A	#N/A	#N/A	#N/A	#N/A	#N/A	#N/A	#N/A	#N/A	#N/A	#N/A	#N/A	#N/A	#N/A	#N/A	#N/A	#N/A	#N/A	#N/A	#N/A	#N/A
F-140	F	0	Community - Healthcare Setting	Healthcare	0	0	0	0	2	45 - 64 years	Asian	#N/A	#N/A	#N/A	0	#N/A	0	#N/A	#N/A	#N/A	#N/A	0	#N/A	#N/A	#N/A	#N/A	#N/A	#N/A	#N/A	#N/A	#N/A	#N/A	#N/A	#N/A	#N/A	#N/A	#N/A	#N/A	#N/A	#N/A	#N/A	#N/A	#N/A
F-141	F	0	Community - Healthcare Setting	Healthcare	0	0	0	0	2	#N/A	Hispanic/Latino	#N/A	#N/A	#N/A	#N/A	#N/A	0	#N/A	#N/A	#N/A	#N/A	#N/A	#N/A	#N/A	#N/A	#N/A	#N/A	#N/A	#N/A	#N/A	#N/A	#N/A	#N/A	#N/A	#N/A	#N/A	#N/A	#N/A	#N/A	#N/A	#N/A	#N/A	#N/A
F-143	F	0	Community - Healthcare Setting	Healthcare	0	0	0	0	#N/A	18 - 44 years	Hispanic/Latino	#N/A	#N/A	#N/A	#N/A	#N/A	0	#N/A	#N/A	#N/A	#N/A	#N/A	#N/A	#N/A	#N/A	#N/A	#N/A	#N/A	#N/A	#N/A	#N/A	#N/A	#N/A	#N/A	#N/A	#N/A	#N/A	#N/A	#N/A	#N/A	#N/A	#N/A	#N/A
F-144	F	0	Community - Healthcare Setting	Healthcare	0	0	0	0	2	45 - 64 years	White, Non-Hispanic	#N/A	#N/A	#N/A	#N/A	#N/A	0	#N/A	#N/A	#N/A	#N/A	#N/A	#N/A	#N/A	#N/A	#N/A	#N/A	#N/A	#N/A	#N/A	#N/A	#N/A	#N/A	#N/A	#N/A	#N/A	#N/A	#N/A	#N/A	#N/A	#N/A	#N/A	#N/A
F-146	F	0	Community - Healthcare Setting	Healthcare	0	0	0	0	2	#N/A	#N/A	#N/A	#N/A	#N/A	#N/A	#N/A	0	#N/A	#N/A	#N/A	#N/A	#N/A	#N/A	#N/A	#N/A	#N/A	#N/A	#N/A	#N/A	#N/A	#N/A	#N/A	#N/A	#N/A	#N/A	#N/A	#N/A	#N/A	#N/A	#N/A	#N/A	#N/A	#N/A
F-147	F	0	Community - Healthcare Setting	Healthcare	0	0	0	0	2	< 10 years	White, Non-Hispanic	#N/A	#N/A	#N/A	#N/A	#N/A	0	#N/A	#N/A	#N/A	#N/A	#N/A	#N/A	#N/A	#N/A	#N/A	#N/A	#N/A	#N/A	#N/A	#N/A	#N/A	#N/A	#N/A	#N/A	#N/A	#N/A	#N/A	#N/A	#N/A	#N/A	#N/A	#N/A
F-148	F	0	Community - Healthcare Setting	Healthcare	0	0	0	0	1	#N/A	#N/A	#N/A	#N/A	#N/A	#N/A	#N/A	0	#N/A	#N/A	#N/A	#N/A	#N/A	#N/A	#N/A	#N/A	#N/A	#N/A	#N/A	#N/A	#N/A	#N/A	#N/A	#N/A	#N/A	#N/A	#N/A	#N/A	#N/A	#N/A	#N/A	#N/A	#N/A	#N/A
F-149	F	0	Community - Healthcare Setting	Healthcare	0	0	0	0	2	< 10 years	#N/A	#N/A	#N/A	#N/A	0	#N/A	0	0	#N/A	0	0	0	#N/A	#N/A	#N/A	#N/A	1	#N/A	#N/A	#N/A	#N/A	#N/A	#N/A	#N/A	#N/A	#N/A	#N/A	#N/A	#N/A	#N/A	#N/A	#N/A	#N/A
F-150	F	0	Community - Healthcare Setting	Healthcare	0	0	0	0	#N/A	#N/A	#N/A	#N/A	#N/A	#N/A	#N/A	#N/A	0	#N/A	#N/A	#N/A	#N/A	#N/A	#N/A	#N/A	#N/A	#N/A	#N/A	#N/A	#N/A	#N/A	#N/A	#N/A	#N/A	#N/A	#N/A	#N/A	#N/A	#N/A	#N/A	#N/A	#N/A	#N/A	#N/A
F-151	F	0	Community - Healthcare Setting	Healthcare	0	0	0	0	#N/A	#N/A	#N/A	#N/A	#N/A	#N/A	#N/A	#N/A	0	#N/A	#N/A	#N/A	#N/A	#N/A	#N/A	#N/A	#N/A	#N/A	#N/A	#N/A	#N/A	#N/A	#N/A	#N/A	#N/A	#N/A	#N/A	#N/A	#N/A	#N/A	#N/A	#N/A	#N/A	#N/A	#N/A
F-154	F	0	Community - Healthcare Setting	Healthcare	0	0	0	0	2	18 - 44 years	Asian	#N/A	#N/A	#N/A	#N/A	#N/A	0	#N/A	#N/A	#N/A	#N/A	#N/A	#N/A	#N/A	#N/A	#N/A	#N/A	#N/A	#N/A	#N/A	#N/A	#N/A	#N/A	#N/A	#N/A	#N/A	#N/A	#N/A	#N/A	#N/A	#N/A	#N/A	#N/A
F-155	F	0	Community - Healthcare Setting	Healthcare	0	0	0	0	2	#N/A	#N/A	#N/A	#N/A	#N/A	#N/A	#N/A	0	#N/A	#N/A	#N/A	#N/A	#N/A	#N/A	#N/A	#N/A	#N/A	#N/A	#N/A	#N/A	#N/A	#N/A	#N/A	#N/A	#N/A	#N/A	#N/A	#N/A	#N/A	#N/A	#N/A	#N/A	#N/A	#N/A
F-156	F	0	Community - Healthcare Setting	Healthcare	0	0	0	0	1	18 - 44 years	Asian	#N/A	#N/A	#N/A	#N/A	#N/A	0	#N/A	#N/A	#N/A	#N/A	#N/A	#N/A	#N/A	#N/A	#N/A	#N/A	#N/A	#N/A	#N/A	#N/A	#N/A	#N/A	#N/A	#N/A	#N/A	#N/A	#N/A	#N/A	#N/A	#N/A	#N/A	#N/A
F-157	F	0	Community - Healthcare Setting	Healthcare	0	0	0	0	1	45 - 64 years	Asian	#N/A	#N/A	#N/A	#N/A	#N/A	0	#N/A	#N/A	#N/A	#N/A	#N/A	#N/A	#N/A	#N/A	#N/A	#N/A	#N/A	#N/A	#N/A	#N/A	#N/A	#N/A	#N/A	#N/A	#N/A	#N/A	#N/A	#N/A	#N/A	#N/A	#N/A	#N/A
F-158	F	0	Community - Healthcare Setting	Healthcare	0	0	0	0	#N/A	#N/A	#N/A	#N/A	#N/A	#N/A	#N/A	#N/A	0	#N/A	#N/A	#N/A	#N/A	#N/A	#N/A	#N/A	#N/A	#N/A	#N/A	#N/A	#N/A	#N/A	#N/A	#N/A	#N/A	#N/A	#N/A	#N/A	#N/A	#N/A	#N/A	#N/A	#N/A	#N/A	#N/A
F-159	F	0	Community - Healthcare Setting	Healthcare	0	0	0	0	2	45 - 64 years	Asian	#N/A	#N/A	#N/A	#N/A	#N/A	0	#N/A	#N/A	#N/A	#N/A	#N/A	#N/A	#N/A	#N/A	#N/A	#N/A	#N/A	#N/A	#N/A	#N/A	#N/A	#N/A	#N/A	#N/A	#N/A	#N/A	#N/A	#N/A	#N/A	#N/A	#N/A	#N/A
F-160	F	0	Community - Healthcare Setting	Healthcare	0	0	0	0	1	65+ years	Asian	#N/A	#N/A	#N/A	#N/A	#N/A	0	#N/A	#N/A	#N/A	#N/A	#N/A	#N/A	#N/A	#N/A	#N/A	#N/A	#N/A	#N/A	#N/A	#N/A	#N/A	#N/A	#N/A	#N/A	#N/A	#N/A	#N/A	#N/A	#N/A	#N/A	#N/A	#N/A
F-161	F	0	Healthcare Worker*	Healthcare	0	0	0	0	1	18 - 44 years	White, Non-Hispanic	#N/A	#N/A	#N/A	#N/A	#N/A	0	#N/A	#N/A	#N/A	#N/A	#N/A	#N/A	#N/A	#N/A	#N/A	#N/A	#N/A	#N/A	#N/A	#N/A	#N/A	#N/A	#N/A	#N/A	#N/A	#N/A	#N/A	#N/A	#N/A	#N/A	0	0
F-162	F	0	Healthcare Worker*	Healthcare	0	0	0	0	2	18 - 44 years	#N/A	#N/A	#N/A	#N/A	0	#N/A	0	#N/A	#N/A	#N/A	#N/A	#N/A	#N/A	#N/A	#N/A	#N/A	#N/A	#N/A	#N/A	#N/A	#N/A	#N/A	#N/A	#N/A	#N/A	#N/A	#N/A	#N/A	#N/A	#N/A	#N/A	0	0
F-163	F	0	Healthcare Worker*	Healthcare	0	0	0	0	2	18 - 44 years	White, Non-Hispanic	#N/A	#N/A	#N/A	#N/A	#N/A	0	#N/A	#N/A	#N/A	#N/A	#N/A	#N/A	#N/A	#N/A	#N/A	#N/A	#N/A	#N/A	#N/A	#N/A	#N/A	#N/A	#N/A	#N/A	#N/A	#N/A	#N/A	#N/A	#N/A	#N/A	0	0
F-164	F	0	Healthcare Worker*	Healthcare	0	0	0	0	#N/A	45 - 64 years	White, Non-Hispanic	#N/A	#N/A	#N/A	#N/A	#N/A	0	#N/A	#N/A	#N/A	#N/A	#N/A	#N/A	#N/A	#N/A	#N/A	#N/A	#N/A	#N/A	#N/A	#N/A	#N/A	#N/A	#N/A	#N/A	#N/A	#N/A	#N/A	#N/A	#N/A	#N/A	0	0
F-165	F	0	Healthcare Worker*	Healthcare	0	0	0	0	2	18 - 44 years	Asian	#N/A	#N/A	#N/A	0	#N/A	0	#N/A	#N/A	#N/A	#N/A	#N/A	#N/A	#N/A	#N/A	#N/A	#N/A	#N/A	0	0	1	1	0	0	1	#N/A	#N/A	#N/A	#N/A	#N/A	#N/A	1	0
F-166	F	0	Healthcare Worker*	Healthcare	0	0	0	0	2	18 - 44 years	White, Non-Hispanic	#N/A	#N/A	#N/A	#N/A	#N/A	0	#N/A	#N/A	#N/A	#N/A	#N/A	#N/A	#N/A	#N/A	#N/A	#N/A	#N/A	#N/A	#N/A	#N/A	#N/A	#N/A	#N/A	#N/A	#N/A	#N/A	#N/A	#N/A	#N/A	#N/A	0	0
F-167	F	0	Healthcare Worker*	Healthcare	0	0	0	0	2	45 - 64 years	Asian	#N/A	#N/A	#N/A	0	#N/A	0	#N/A	#N/A	#N/A	#N/A	#N/A	#N/A	#N/A	#N/A	#N/A	#N/A	#N/A	0	0	1	1	0	0	1	#N/A	#N/A	#N/A	#N/A	#N/A	#N/A	1	0
F-168	F	0	Healthcare Worker*	Healthcare	0	0	0	0	2	45 - 64 years	White, Non-Hispanic	#N/A	#N/A	#N/A	#N/A	#N/A	0	#N/A	#N/A	#N/A	#N/A	#N/A	#N/A	#N/A	#N/A	#N/A	#N/A	#N/A	#N/A	#N/A	#N/A	#N/A	#N/A	#N/A	#N/A	#N/A	#N/A	#N/A	#N/A	#N/A	#N/A	0	0
F-169	F	0	Community - Healthcare Setting	Healthcare	0	0	0	0	#N/A	65+ years	Asian	#N/A	#N/A	#N/A	#N/A	#N/A	0	#N/A	#N/A	#N/A	#N/A	#N/A	#N/A	#N/A	#N/A	#N/A	#N/A	#N/A	#N/A	#N/A	#N/A	#N/A	#N/A	#N/A	#N/A	#N/A	#N/A	#N/A	#N/A	#N/A	#N/A	#N/A	#N/A
F-170	F	0	Community - Healthcare Setting	Healthcare	0	0	0	0	2	65+ years	Asian	#N/A	#N/A	#N/A	#N/A	#N/A	0	#N/A	#N/A	#N/A	#N/A	#N/A	#N/A	#N/A	#N/A	#N/A	#N/A	#N/A	#N/A	#N/A	#N/A	#N/A	#N/A	#N/A	#N/A	#N/A	#N/A	#N/A	#N/A	#N/A	#N/A	#N/A	#N/A
F-171	F	0	Healthcare Worker*	Healthcare	0	0	0	0	2	45 - 64 years	Asian	#N/A	#N/A	#N/A	#N/A	#N/A	0	#N/A	#N/A	#N/A	#N/A	#N/A	#N/A	#N/A	#N/A	#N/A	#N/A	#N/A	#N/A	#N/A	#N/A	#N/A	#N/A	#N/A	#N/A	#N/A	#N/A	#N/A	#N/A	#N/A	#N/A	0	0
F-172	F	0	Healthcare Worker*	Healthcare	0	0	0	0	2	#N/A	Hispanic/Latino	#N/A	#N/A	#N/A	#N/A	#N/A	0	#N/A	#N/A	#N/A	#N/A	#N/A	#N/A	#N/A	#N/A	#N/A	#N/A	#N/A	#N/A	#N/A	#N/A	#N/A	#N/A	#N/A	#N/A	#N/A	#N/A	#N/A	#N/A	#N/A	#N/A	0	0
F-173	F	0	Healthcare Worker*	Healthcare	0	0	0	0	2	18 - 44 years	Black, Non-Hispanic	#N/A	#N/A	#N/A	#N/A	#N/A	0	#N/A	#N/A	#N/A	#N/A	#N/A	#N/A	#N/A	#N/A	#N/A	#N/A	#N/A	#N/A	#N/A	#N/A	#N/A	#N/A	#N/A	#N/A	#N/A	#N/A	#N/A	#N/A	#N/A	#N/A	0	0
F-174	F	0	Healthcare Worker*	Healthcare	0	0	0	0	2	45 - 64 years	White, Non-Hispanic	#N/A	#N/A	#N/A	0	#N/A	0	#N/A	#N/A	#N/A	#N/A	#N/A	#N/A	#N/A	#N/A	#N/A	#N/A	#N/A	#N/A	#N/A	#N/A	#N/A	#N/A	#N/A	#N/A	#N/A	#N/A	#N/A	#N/A	#N/A	#N/A	0	0
F-175	F	0	Healthcare Worker*	Healthcare	0	0	0	0	2	45 - 64 years	Hispanic/Latino	#N/A	#N/A	#N/A	#N/A	#N/A	0	#N/A	#N/A	#N/A	#N/A	#N/A	#N/A	#N/A	#N/A	#N/A	#N/A	#N/A	#N/A	#N/A	#N/A	#N/A	#N/A	#N/A	#N/A	#N/A	#N/A	#N/A	#N/A	#N/A	#N/A	0	0
F-176	F	0	Healthcare Worker*	Healthcare	0	0	0	0	2	45 - 64 years	Asian	#N/A	#N/A	#N/A	#N/A	#N/A	0	#N/A	#N/A	#N/A	#N/A	#N/A	#N/A	#N/A	#N/A	#N/A	#N/A	#N/A	#N/A	#N/A	#N/A	#N/A	#N/A	#N/A	#N/A	#N/A	#N/A	#N/A	#N/A	#N/A	#N/A	0	0
F-177	F	0	Healthcare Worker*	Healthcare	0	0	0	0	2	18 - 44 years	Hispanic/Latino	#N/A	#N/A	#N/A	#N/A	#N/A	0	#N/A	#N/A	#N/A	#N/A	#N/A	#N/A	#N/A	#N/A	#N/A	#N/A	#N/A	#N/A	#N/A	#N/A	#N/A	#N/A	#N/A	#N/A	#N/A	#N/A	#N/A	#N/A	#N/A	#N/A	0	0
F-178	F	0	Community - Healthcare Setting	Healthcare	0	0	0	0	2	65+ years	White, Non-Hispanic	#N/A	#N/A	#N/A	#N/A	#N/A	0	#N/A	#N/A	#N/A	#N/A	#N/A	#N/A	#N/A	#N/A	#N/A	#N/A	#N/A	#N/A	#N/A	#N/A	#N/A	#N/A	#N/A	#N/A	#N/A	#N/A	#N/A	#N/A	#N/A	#N/A	#N/A	#N/A
F-179	F	0	Community - Healthcare Setting	Healthcare	0	0	0	0	#N/A	18 - 44 years	White, Non-Hispanic	#N/A	#N/A	#N/A	#N/A	#N/A	0	#N/A	#N/A	#N/A	#N/A	#N/A	#N/A	#N/A	#N/A	#N/A	#N/A	#N/A	#N/A	#N/A	#N/A	#N/A	#N/A	#N/A	#N/A	#N/A	#N/A	#N/A	#N/A	#N/A	#N/A	#N/A	#N/A
F-180	F	0	Community - Healthcare Setting	Healthcare	0	0	0	0	#N/A	#N/A	White, Non-Hispanic	#N/A	#N/A	#N/A	#N/A	#N/A	0	#N/A	#N/A	#N/A	#N/A	#N/A	#N/A	#N/A	#N/A	#N/A	#N/A	#N/A	#N/A	#N/A	#N/A	#N/A	#N/A	#N/A	#N/A	#N/A	#N/A	#N/A	#N/A	#N/A	#N/A	#N/A	#N/A
F-181	F	0	Community - Healthcare Setting	Healthcare	0	0	0	0	2	18 - 44 years	#N/A	#N/A	#N/A	#N/A	0	#N/A	0	0	#N/A	0	0	0	#N/A	#N/A	#N/A	#N/A	1	#N/A	#N/A	#N/A	#N/A	#N/A	#N/A	#N/A	#N/A	#N/A	#N/A	#N/A	#N/A	#N/A	#N/A	#N/A	#N/A
F-182	F	0	Community - Healthcare Setting	Healthcare	0	0	0	0	1	18 - 44 years	#N/A	#N/A	#N/A	#N/A	#N/A	#N/A	0	0	#N/A	0	0	#N/A	#N/A	#N/A	#N/A	#N/A	1	#N/A	#N/A	#N/A	#N/A	#N/A	#N/A	#N/A	#N/A	#N/A	#N/A	#N/A	#N/A	#N/A	#N/A	#N/A	#N/A
F-183	F	0	Healthcare Worker*	Healthcare	0	0	0	0	2	18 - 44 years	White, Non-Hispanic	#N/A	#N/A	#N/A	#N/A	#N/A	0	#N/A	#N/A	#N/A	#N/A	#N/A	#N/A	#N/A	#N/A	#N/A	#N/A	#N/A	2	0	0	0	0	0	0	#N/A	#N/A	#N/A	#N/A	#N/A	#N/A	1	0
F-184	F	0	Healthcare Worker*	Healthcare	0	0	0	0	2	18 - 44 years	Hispanic/Latino	#N/A	#N/A	#N/A	#N/A	#N/A	0	#N/A	#N/A	#N/A	#N/A	#N/A	#N/A	#N/A	#N/A	#N/A	#N/A	#N/A	#N/A	#N/A	#N/A	#N/A	#N/A	#N/A	#N/A	#N/A	#N/A	#N/A	#N/A	#N/A	#N/A	0	0
F-185	F	0	Community - Healthcare Setting	Healthcare	0	0	0	0	1	#N/A	#N/A	#N/A	#N/A	#N/A	0	#N/A	0	0	#N/A	0	0	0	#N/A	#N/A	#N/A	#N/A	1	#N/A	#N/A	#N/A	#N/A	#N/A	#N/A	#N/A	#N/A	#N/A	#N/A	#N/A	#N/A	#N/A	#N/A	#N/A	#N/A
F-186	F	0	Community - Healthcare Setting	Healthcare	0	0	0	0	2	#N/A	#N/A	#N/A	#N/A	#N/A	#N/A	#N/A	0	#N/A	#N/A	#N/A	#N/A	#N/A	#N/A	#N/A	#N/A	#N/A	#N/A	#N/A	#N/A	#N/A	#N/A	#N/A	#N/A	#N/A	#N/A	#N/A	#N/A	#N/A	#N/A	#N/A	#N/A	#N/A	#N/A
F-187	F	0	Community - Healthcare Setting	Healthcare	0	0	0	0	2	#N/A	#N/A	#N/A	#N/A	#N/A	#N/A	#N/A	0	#N/A	#N/A	#N/A	#N/A	#N/A	#N/A	#N/A	#N/A	#N/A	#N/A	#N/A	#N/A	#N/A	#N/A	#N/A	#N/A	#N/A	#N/A	#N/A	#N/A	#N/A	#N/A	#N/A	#N/A	#N/A	#N/A
F-188	F	0	Community - Healthcare Setting	Healthcare	0	0	0	0	#N/A	#N/A	#N/A	#N/A	#N/A	#N/A	#N/A	#N/A	0	0	#N/A	0	0	0	#N/A	#N/A	#N/A	#N/A	1	#N/A	#N/A	#N/A	#N/A	#N/A	#N/A	#N/A	#N/A	#N/A	#N/A	#N/A	#N/A	#N/A	#N/A	#N/A	#N/A
F-189	F	0	Community - Healthcare Setting	Healthcare	0	0	0	0	1	#N/A	#N/A	#N/A	#N/A	#N/A	#N/A	#N/A	0	#N/A	#N/A	#N/A	#N/A	#N/A	#N/A	#N/A	#N/A	#N/A	#N/A	#N/A	#N/A	#N/A	#N/A	#N/A	#N/A	#N/A	#N/A	#N/A	#N/A	#N/A	#N/A	#N/A	#N/A	#N/A	#N/A
F-190	F	0	Healthcare Worker*	Healthcare	0	0	0	0	1	#N/A	Black, Non-Hispanic	#N/A	#N/A	#N/A	#N/A	#N/A	0	#N/A	#N/A	#N/A	#N/A	#N/A	#N/A	#N/A	#N/A	#N/A	#N/A	#N/A	#N/A	#N/A	#N/A	#N/A	#N/A	#N/A	#N/A	#N/A	#N/A	#N/A	#N/A	#N/A	#N/A	0	0
F-191	F	0	Community - Other	Workplace (non-HC)	0	0	0	0	2	18 - 44 years	Asian	#N/A	#N/A	#N/A	#N/A	#N/A	0	#N/A	#N/A	#N/A	#N/A	#N/A	#N/A	#N/A	#N/A	#N/A	#N/A	#N/A	#N/A	#N/A	#N/A	#N/A	#N/A	#N/A	#N/A	#N/A	#N/A	#N/A	#N/A	#N/A	#N/A	#N/A	#N/A
F-192	F	0	Community - Healthcare Setting	Healthcare	0	0	0	0	1	18 - 44 years	#N/A	#N/A	#N/A	#N/A	#N/A	#N/A	0	#N/A	#N/A	#N/A	#N/A	#N/A	#N/A	#N/A	#N/A	#N/A	#N/A	#N/A	#N/A	#N/A	#N/A	#N/A	#N/A	#N/A	#N/A	#N/A	#N/A	#N/A	#N/A	#N/A	#N/A	#N/A	#N/A
F-193	F	0	Community - Healthcare Setting	Healthcare	0	0	0	0	1	< 10 years	#N/A	#N/A	#N/A	#N/A	#N/A	#N/A	0	#N/A	#N/A	#N/A	#N/A	#N/A	#N/A	#N/A	#N/A	#N/A	#N/A	#N/A	#N/A	#N/A	#N/A	#N/A	#N/A	#N/A	#N/A	#N/A	#N/A	#N/A	#N/A	#N/A	#N/A	#N/A	#N/A
F-194	F	0	Community - Healthcare Setting	Healthcare	0	0	0	0	1	< 10 years	#N/A	#N/A	#N/A	#N/A	#N/A	#N/A	0	#N/A	#N/A	#N/A	#N/A	#N/A	#N/A	#N/A	#N/A	#N/A	#N/A	#N/A	#N/A	#N/A	#N/A	#N/A	#N/A	#N/A	#N/A	#N/A	#N/A	#N/A	#N/A	#N/A	#N/A	#N/A	#N/A
F-195	F	0	Community - Healthcare Setting	Healthcare	0	0	0	0	1	10 - 18 years	#N/A	#N/A	#N/A	#N/A	#N/A	#N/A	0	#N/A	#N/A	#N/A	#N/A	#N/A	#N/A	#N/A	#N/A	#N/A	#N/A	#N/A	#N/A	#N/A	#N/A	#N/A	#N/A	#N/A	#N/A	#N/A	#N/A	#N/A	#N/A	#N/A	#N/A	#N/A	#N/A
F-196	F	0	Community - Healthcare Setting	Healthcare	0	0	0	0	2	10 - 18 years	#N/A	#N/A	#N/A	#N/A	#N/A	#N/A	0	#N/A	#N/A	#N/A	#N/A	#N/A	#N/A	#N/A	#N/A	#N/A	#N/A	#N/A	#N/A	#N/A	#N/A	#N/A	#N/A	#N/A	#N/A	#N/A	#N/A	#N/A	#N/A	#N/A	#N/A	#N/A	#N/A
F-197	F	0	Community - Other	Workplace (non-HC)	0	0	0	0	1	45 - 64 years	White, Non-Hispanic	#N/A	#N/A	#N/A	#N/A	#N/A	0	1	#N/A	1	#N/A	0	#N/A	#N/A	#N/A	#N/A	1	#N/A	#N/A	#N/A	#N/A	#N/A	#N/A	#N/A	#N/A	#N/A	#N/A	#N/A	#N/A	#N/A	#N/A	#N/A	#N/A
F-198	F	0	Community - Healthcare Setting	Healthcare	0	0	0	0	1	#N/A	#N/A	#N/A	#N/A	#N/A	#N/A	#N/A	0	#N/A	#N/A	#N/A	#N/A	#N/A	#N/A	#N/A	#N/A	#N/A	#N/A	#N/A	#N/A	#N/A	#N/A	#N/A	#N/A	#N/A	#N/A	#N/A	#N/A	#N/A	#N/A	#N/A	#N/A	#N/A	#N/A
F-199	F	0	Community - Healthcare Setting	Healthcare	0	0	0	0	2	#N/A	#N/A	#N/A	#N/A	#N/A	#N/A	#N/A	0	#N/A	#N/A	#N/A	#N/A	#N/A	#N/A	#N/A	#N/A	#N/A	#N/A	#N/A	#N/A	#N/A	#N/A	#N/A	#N/A	#N/A	#N/A	#N/A	#N/A	#N/A	#N/A	#N/A	#N/A	#N/A	#N/A
F-200	F	0	Community - Other	Workplace (non-HC)	0	0	0	0	1	#N/A	#N/A	#N/A	#N/A	#N/A	#N/A	#N/A	0	#N/A	#N/A	#N/A	#N/A	#N/A	#N/A	#N/A	#N/A	#N/A	#N/A	#N/A	#N/A	#N/A	#N/A	#N/A	#N/A	#N/A	#N/A	#N/A	#N/A	#N/A	#N/A	#N/A	#N/A	#N/A	#N/A
F-201	F	0	Community - Other	Workplace (non-HC)	0	0	0	0	1	#N/A	#N/A	#N/A	#N/A	#N/A	#N/A	#N/A	0	#N/A	#N/A	#N/A	#N/A	#N/A	#N/A	#N/A	#N/A	#N/A	#N/A	#N/A	#N/A	#N/A	#N/A	#N/A	#N/A	#N/A	#N/A	#N/A	#N/A	#N/A	#N/A	#N/A	#N/A	#N/A	#N/A
F-202	F	0	Community - Other	Workplace (non-HC)	0	0	0	0	1	45 - 64 years	#N/A	#N/A	#N/A	#N/A	#N/A	#N/A	0	1	#N/A	1	#N/A	0	#N/A	#N/A	#N/A	#N/A	1	#N/A	#N/A	#N/A	#N/A	#N/A	#N/A	#N/A	#N/A	#N/A	#N/A	#N/A	#N/A	#N/A	#N/A	#N/A	#N/A
F-203	F	0	Community - Other	Workplace (non-HC)	0	0	0	0	2	#N/A	#N/A	#N/A	#N/A	#N/A	#N/A	#N/A	0	#N/A	#N/A	#N/A	#N/A	#N/A	#N/A	#N/A	#N/A	#N/A	#N/A	#N/A	#N/A	#N/A	#N/A	#N/A	#N/A	#N/A	#N/A	#N/A	#N/A	#N/A	#N/A	#N/A	#N/A	#N/A	#N/A
F-204	F	0	Community - Healthcare Setting	Healthcare	0	0	0	0	2	18 - 44 years	Hispanic/Latino	#N/A	#N/A	#N/A	#N/A	#N/A	0	#N/A	#N/A	#N/A	#N/A	#N/A	#N/A	#N/A	#N/A	#N/A	#N/A	#N/A	#N/A	#N/A	#N/A	#N/A	#N/A	#N/A	#N/A	#N/A	#N/A	#N/A	#N/A	#N/A	#N/A	#N/A	#N/A
F-205	F	0	Community - Other	Workplace (non-HC)	0	0	0	0	1	#N/A	#N/A	#N/A	#N/A	#N/A	#N/A	#N/A	0	#N/A	#N/A	#N/A	#N/A	#N/A	#N/A	#N/A	#N/A	#N/A	#N/A	#N/A	#N/A	#N/A	#N/A	#N/A	#N/A	#N/A	#N/A	#N/A	#N/A	#N/A	#N/A	#N/A	#N/A	#N/A	#N/A
F-206	F	0	Community - Healthcare Setting	Healthcare	0	0	0	0	1	#N/A	#N/A	#N/A	#N/A	#N/A	#N/A	#N/A	0	#N/A	#N/A	#N/A	#N/A	#N/A	#N/A	#N/A	#N/A	#N/A	#N/A	#N/A	#N/A	#N/A	#N/A	#N/A	#N/A	#N/A	#N/A	#N/A	#N/A	#N/A	#N/A	#N/A	#N/A	#N/A	#N/A
F-207	F	0	Community - Healthcare Setting	Healthcare	0	0	0	0	1	45 - 64 years	Hispanic/Latino	#N/A	#N/A	#N/A	#N/A	#N/A	0	#N/A	#N/A	#N/A	#N/A	#N/A	#N/A	#N/A	#N/A	#N/A	#N/A	#N/A	#N/A	#N/A	#N/A	#N/A	#N/A	#N/A	#N/A	#N/A	#N/A	#N/A	#N/A	#N/A	#N/A	#N/A	#N/A
F-208	F	0	Community - Healthcare Setting	Healthcare	0	0	0	0	2	#N/A	#N/A	#N/A	#N/A	#N/A	#N/A	#N/A	0	#N/A	#N/A	#N/A	#N/A	#N/A	#N/A	#N/A	#N/A	#N/A	#N/A	#N/A	#N/A	#N/A	#N/A	#N/A	#N/A	#N/A	#N/A	#N/A	#N/A	#N/A	#N/A	#N/A	#N/A	#N/A	#N/A
F-209	F	0	Community - Other	Workplace (non-HC)	0	0	0	0	2	#N/A	#N/A	#N/A	#N/A	#N/A	#N/A	#N/A	0	#N/A	#N/A	#N/A	#N/A	#N/A	#N/A	#N/A	#N/A	#N/A	#N/A	#N/A	#N/A	#N/A	#N/A	#N/A	#N/A	#N/A	#N/A	#N/A	#N/A	#N/A	#N/A	#N/A	#N/A	#N/A	#N/A
F-210	F	0	Community - Other	Workplace (non-HC)	0	0	0	0	2	#N/A	#N/A	#N/A	#N/A	#N/A	#N/A	#N/A	0	#N/A	#N/A	#N/A	#N/A	#N/A	#N/A	#N/A	#N/A	#N/A	#N/A	#N/A	#N/A	#N/A	#N/A	#N/A	#N/A	#N/A	#N/A	#N/A	#N/A	#N/A	#N/A	#N/A	#N/A	#N/A	#N/A
F-211	F	0	Community - Other	Workplace (non-HC)	0	0	0	0	2	#N/A	#N/A	#N/A	#N/A	#N/A	#N/A	#N/A	0	1	#N/A	1	#N/A	0	#N/A	#N/A	#N/A	#N/A	1	#N/A	#N/A	#N/A	#N/A	#N/A	#N/A	#N/A	#N/A	#N/A	#N/A	#N/A	#N/A	#N/A	#N/A	#N/A	#N/A
F-212	F	0	Community - Other	Workplace (non-HC)	0	0	0	0	2	45 - 64 years	#N/A	#N/A	#N/A	#N/A	#N/A	#N/A	0	1	#N/A	1	#N/A	0	#N/A	#N/A	#N/A	#N/A	1	#N/A	#N/A	#N/A	#N/A	#N/A	#N/A	#N/A	#N/A	#N/A	#N/A	#N/A	#N/A	#N/A	#N/A	#N/A	#N/A
F-213	F	0	Healthcare Worker*	Healthcare	0	0	0	0	2	18 - 44 years	Asian	#N/A	#N/A	#N/A	#N/A	#N/A	0	#N/A	#N/A	#N/A	#N/A	#N/A	#N/A	#N/A	#N/A	#N/A	#N/A	#N/A	2	0	0	0	0	0	0	#N/A	#N/A	#N/A	#N/A	#N/A	#N/A	1	0
F-214	F	0	Healthcare Worker*	Healthcare	0	0	0	0	1	18 - 44 years	Asian	#N/A	#N/A	#N/A	#N/A	#N/A	0	#N/A	#N/A	#N/A	#N/A	#N/A	#N/A	#N/A	#N/A	#N/A	#N/A	#N/A	2	0	0	0	0	0	0	#N/A	#N/A	#N/A	#N/A	#N/A	#N/A	1	0
F-215	F	0	Healthcare Worker*	Healthcare	0	0	0	0	2	18 - 44 years	White, Non-Hispanic	#N/A	#N/A	#N/A	#N/A	#N/A	0	#N/A	#N/A	#N/A	#N/A	#N/A	#N/A	#N/A	#N/A	#N/A	#N/A	#N/A	#N/A	#N/A	#N/A	#N/A	#N/A	#N/A	#N/A	#N/A	#N/A	#N/A	#N/A	#N/A	#N/A	0	0
F-216	F	0	Healthcare Worker*	Healthcare	0	0	0	0	1	45 - 64 years	Hispanic/Latino	#N/A	#N/A	#N/A	#N/A	#N/A	0	#N/A	#N/A	#N/A	#N/A	#N/A	#N/A	#N/A	#N/A	#N/A	#N/A	#N/A	1	0	0	0	1	0	0	#N/A	#N/A	#N/A	#N/A	#N/A	#N/A	1	0
F-217	F	0	Healthcare Worker*	Healthcare	0	0	0	0	2	18 - 44 years	Hispanic/Latino	#N/A	#N/A	#N/A	#N/A	#N/A	0	#N/A	#N/A	#N/A	#N/A	#N/A	#N/A	#N/A	#N/A	#N/A	#N/A	#N/A	2	0	0	0	0	0	0	#N/A	#N/A	#N/A	#N/A	#N/A	#N/A	1	0
F-218	F	0	Healthcare Worker*	Healthcare	0	0	0	0	2	18 - 44 years	Other	#N/A	#N/A	#N/A	#N/A	#N/A	0	#N/A	#N/A	#N/A	#N/A	#N/A	#N/A	#N/A	#N/A	#N/A	#N/A	#N/A	#N/A	#N/A	#N/A	#N/A	#N/A	#N/A	#N/A	#N/A	#N/A	#N/A	#N/A	#N/A	#N/A	0	0
F-219	F	0	Community - Healthcare Setting	Healthcare	0	0	0	0	1	45 - 64 years	White, Non-Hispanic	#N/A	#N/A	#N/A	#N/A	#N/A	0	#N/A	#N/A	#N/A	#N/A	#N/A	#N/A	#N/A	#N/A	#N/A	#N/A	#N/A	#N/A	#N/A	#N/A	#N/A	#N/A	#N/A	#N/A	#N/A	#N/A	#N/A	#N/A	#N/A	#N/A	#N/A	#N/A
F-220	F	0	Healthcare Worker*	Healthcare	0	0	0	0	1	45 - 64 years	White, Non-Hispanic	#N/A	#N/A	#N/A	#N/A	#N/A	0	#N/A	#N/A	#N/A	#N/A	#N/A	#N/A	#N/A	#N/A	#N/A	#N/A	#N/A	0	0	0	1	1	0	0	#N/A	#N/A	#N/A	#N/A	#N/A	#N/A	1	0
F-221	F	0	Healthcare Worker*	Healthcare	0	0	0	0	1	45 - 64 years	White, Non-Hispanic	#N/A	#N/A	#N/A	#N/A	#N/A	0	#N/A	#N/A	#N/A	#N/A	#N/A	#N/A	#N/A	#N/A	#N/A	#N/A	#N/A	#N/A	#N/A	#N/A	#N/A	#N/A	#N/A	#N/A	#N/A	#N/A	#N/A	#N/A	#N/A	#N/A	0	0
F-222	F	0	Community - Other	Workplace (non-HC)	0	0	0	0	2	45 - 64 years	Asian	#N/A	#N/A	#N/A	#N/A	#N/A	0	1	#N/A	1	#N/A	0	#N/A	#N/A	#N/A	#N/A	1	#N/A	#N/A	#N/A	#N/A	#N/A	#N/A	#N/A	#N/A	#N/A	#N/A	#N/A	#N/A	#N/A	#N/A	#N/A	#N/A
F-224	F	0	Healthcare Worker*	Healthcare	0	0	0	0	#N/A	#N/A	#N/A	#N/A	#N/A	#N/A	#N/A	#N/A	0	#N/A	#N/A	#N/A	#N/A	#N/A	#N/A	#N/A	#N/A	#N/A	#N/A	#N/A	#N/A	#N/A	#N/A	#N/A	#N/A	#N/A	#N/A	#N/A	#N/A	#N/A	#N/A	#N/A	#N/A	0	0
F-226	F	0	Healthcare Worker*	Healthcare	0	0	0	0	#N/A	#N/A	#N/A	#N/A	#N/A	#N/A	#N/A	#N/A	0	#N/A	#N/A	#N/A	#N/A	#N/A	#N/A	#N/A	#N/A	#N/A	#N/A	#N/A	#N/A	#N/A	#N/A	#N/A	#N/A	#N/A	#N/A	#N/A	#N/A	#N/A	#N/A	#N/A	#N/A	0	0
F-227	F	0	Healthcare Worker*	Healthcare	0	0	0	0	#N/A	#N/A	#N/A	#N/A	#N/A	#N/A	#N/A	#N/A	0	#N/A	#N/A	#N/A	#N/A	#N/A	#N/A	#N/A	#N/A	#N/A	#N/A	#N/A	#N/A	#N/A	#N/A	#N/A	#N/A	#N/A	#N/A	#N/A	#N/A	#N/A	#N/A	#N/A	#N/A	0	0
F-229	F	0	Healthcare Worker*	Healthcare	0	0	0	0	2	#N/A	White, Non-Hispanic	#N/A	#N/A	#N/A	#N/A	#N/A	0	#N/A	#N/A	#N/A	#N/A	#N/A	#N/A	#N/A	#N/A	#N/A	#N/A	#N/A	2	0	0	0	0	0	0	#N/A	#N/A	#N/A	#N/A	#N/A	#N/A	1	0
F-230	F	0	Healthcare Worker*	Healthcare	0	0	0	0	#N/A	#N/A	#N/A	#N/A	#N/A	#N/A	#N/A	#N/A	0	#N/A	#N/A	#N/A	#N/A	#N/A	#N/A	#N/A	#N/A	#N/A	#N/A	#N/A	#N/A	#N/A	#N/A	#N/A	#N/A	#N/A	#N/A	#N/A	#N/A	#N/A	#N/A	#N/A	#N/A	0	0
F-235	F	0	Healthcare Worker*	Healthcare	0	0	0	0	#N/A	#N/A	#N/A	#N/A	#N/A	#N/A	#N/A	#N/A	0	#N/A	#N/A	#N/A	#N/A	#N/A	#N/A	#N/A	#N/A	#N/A	#N/A	#N/A	#N/A	#N/A	#N/A	#N/A	#N/A	#N/A	#N/A	#N/A	#N/A	#N/A	#N/A	#N/A	#N/A	0	0
F-236	F	0	Healthcare Worker*	Healthcare	0	0	0	0	#N/A	#N/A	#N/A	#N/A	#N/A	#N/A	#N/A	#N/A	0	#N/A	#N/A	#N/A	#N/A	#N/A	#N/A	#N/A	#N/A	#N/A	#N/A	#N/A	#N/A	#N/A	#N/A	#N/A	#N/A	#N/A	#N/A	#N/A	#N/A	#N/A	#N/A	#N/A	#N/A	0	0
F-239	F	0	Community - Other	Workplace (non-HC)	0	0	0	0	2	18 - 44 years	White, Non-Hispanic	#N/A	#N/A	#N/A	#N/A	#N/A	0	#N/A	#N/A	#N/A	#N/A	#N/A	#N/A	#N/A	#N/A	#N/A	#N/A	#N/A	#N/A	#N/A	#N/A	#N/A	#N/A	#N/A	#N/A	#N/A	#N/A	#N/A	#N/A	#N/A	#N/A	#N/A	#N/A
F-240	F	0	Healthcare Worker*	Healthcare	0	0	0	0	#N/A	#N/A	#N/A	#N/A	#N/A	#N/A	#N/A	#N/A	0	#N/A	#N/A	#N/A	#N/A	#N/A	#N/A	#N/A	#N/A	#N/A	#N/A	#N/A	#N/A	#N/A	#N/A	#N/A	#N/A	#N/A	#N/A	#N/A	#N/A	#N/A	#N/A	#N/A	#N/A	0	0
F-252	F	0	Community - Healthcare Setting	Healthcare	0	0	0	0	#N/A	#N/A	#N/A	#N/A	#N/A	#N/A	#N/A	#N/A	0	#N/A	#N/A	#N/A	#N/A	#N/A	#N/A	#N/A	#N/A	#N/A	#N/A	#N/A	#N/A	#N/A	#N/A	#N/A	#N/A	#N/A	#N/A	#N/A	#N/A	#N/A	#N/A	#N/A	#N/A	#N/A	#N/A
F-253	F	0	Healthcare Worker*	Healthcare	0	0	0	0	2	45 - 64 years	Asian	#N/A	#N/A	#N/A	#N/A	#N/A	0	#N/A	#N/A	#N/A	#N/A	#N/A	#N/A	#N/A	#N/A	#N/A	#N/A	#N/A	#N/A	#N/A	#N/A	#N/A	#N/A	#N/A	#N/A	#N/A	#N/A	#N/A	#N/A	#N/A	#N/A	0	0
F-626	F	0	Healthcare Worker*	Healthcare	0	0	0	0	#N/A	#N/A	#N/A	#N/A	#N/A	#N/A	#N/A	#N/A	0	#N/A	#N/A	#N/A	#N/A	#N/A	#N/A	#N/A	#N/A	#N/A	#N/A	#N/A	#N/A	#N/A	#N/A	#N/A	#N/A	#N/A	#N/A	#N/A	#N/A	#N/A	#N/A	#N/A	#N/A	0	0
H-001	H	1	Household	Private Home	1	0	1	1	2	18 - 44 years	Asian	0	#N/A	0	0	0	1	1	#N/A	1	1	1	#N/A	1	#N/A	#N/A	1	#N/A	#N/A	#N/A	#N/A	#N/A	#N/A	#N/A	#N/A	#N/A	#N/A	#N/A	#N/A	#N/A	#N/A	#N/A	#N/A
H-002	H	1	Household	Private Home	0	0	1	1	1	18 - 44 years	Asian	2	0	0	0	0	0	1	< 15 minutes	0	0	0	#N/A	1	#N/A	0	0	#N/A	#N/A	#N/A	#N/A	#N/A	#N/A	#N/A	#N/A	#N/A	#N/A	#N/A	#N/A	#N/A	#N/A	#N/A	#N/A
H-003	H	1	Household	Private Home	0	0	1	1	1	18 - 44 years	Asian	0	0	0	0	0	0	1	< 15 minutes	0	0	0	#N/A	0	#N/A	0	1	< 15 minutes	#N/A	#N/A	#N/A	#N/A	#N/A	#N/A	#N/A	#N/A	#N/A	#N/A	#N/A	#N/A	#N/A	#N/A	#N/A
H-004	H	0	Healthcare Worker*	Healthcare	0	0	1	1	#N/A	#N/A	#N/A	#N/A	#N/A	#N/A	#N/A	#N/A	0	#N/A	#N/A	#N/A	#N/A	#N/A	#N/A	#N/A	#N/A	#N/A	#N/A	#N/A	0	1	#N/A	#N/A	#N/A	#N/A	#N/A	0	#N/A	#N/A	#N/A	#N/A	#N/A	1	1
H-005	H	0	Community - Other	Transit/Transit Hub	0	0	1	0	#N/A	#N/A	#N/A	#N/A	#N/A	#N/A	#N/A	#N/A	0	#N/A	#N/A	#N/A	#N/A	1	#N/A	#N/A	#N/A	#N/A	#N/A	#N/A	#N/A	#N/A	#N/A	#N/A	#N/A	#N/A	#N/A	#N/A	#N/A	#N/A	#N/A	#N/A	#N/A	#N/A	#N/A
H-006	H	0	Community - Other	Transit/Transit Hub	0	0	1	0	#N/A	#N/A	#N/A	#N/A	#N/A	#N/A	#N/A	#N/A	0	#N/A	#N/A	#N/A	#N/A	1	#N/A	#N/A	#N/A	#N/A	#N/A	#N/A	#N/A	#N/A	#N/A	#N/A	#N/A	#N/A	#N/A	#N/A	#N/A	#N/A	#N/A	#N/A	#N/A	#N/A	#N/A
H-007	H	0	Community - Other	Transit/Transit Hub	0	0	1	0	#N/A	#N/A	#N/A	#N/A	#N/A	#N/A	#N/A	#N/A	0	#N/A	#N/A	#N/A	#N/A	1	#N/A	#N/A	#N/A	#N/A	#N/A	#N/A	#N/A	#N/A	#N/A	#N/A	#N/A	#N/A	#N/A	#N/A	#N/A	#N/A	#N/A	#N/A	#N/A	#N/A	#N/A
H-008	H	0	Healthcare Worker*	Healthcare	0	0	1	1	#N/A	#N/A	#N/A	#N/A	#N/A	#N/A	#N/A	#N/A	0	#N/A	#N/A	#N/A	#N/A	#N/A	#N/A	#N/A	#N/A	#N/A	#N/A	#N/A	0	#N/A	#N/A	#N/A	#N/A	0	1	0	#N/A	#N/A	#N/A	1	0	1	1
H-009	H	0	Community - Other	Transit/Transit Hub	0	0	1	0	#N/A	#N/A	#N/A	#N/A	#N/A	#N/A	#N/A	#N/A	0	#N/A	#N/A	#N/A	#N/A	1	#N/A	#N/A	#N/A	#N/A	#N/A	#N/A	#N/A	#N/A	#N/A	#N/A	#N/A	#N/A	#N/A	#N/A	#N/A	#N/A	#N/A	#N/A	#N/A	#N/A	#N/A
H-010	H	0	Healthcare Worker*	Healthcare	0	0	1	1	#N/A	#N/A	#N/A	#N/A	#N/A	#N/A	#N/A	#N/A	0	#N/A	#N/A	#N/A	#N/A	#N/A	#N/A	#N/A	#N/A	#N/A	#N/A	#N/A	0	#N/A	#N/A	#N/A	#N/A	#N/A	#N/A	#N/A	#N/A	#N/A	#N/A	#N/A	#N/A	1	0
H-026	H	0	Community - Other	Other	0	0	1	1	1	18 - 44 years	Asian	0	0	1	0	0	0	1	>= 15 minutes	0	1	1	> 1 hour	1	>= 15 minutes	0	1	15 minutes - < 3 hours	#N/A	#N/A	#N/A	#N/A	#N/A	#N/A	#N/A	#N/A	#N/A	#N/A	#N/A	#N/A	#N/A	#N/A	#N/A
H-034	H	0	Community - Other	Other	0	0	1	1	2	18 - 44 years	Asian	0	0	0	0	0	0	1	>= 15 minutes	0	1	1	> 1 hour	1	>= 15 minutes	0	1	15 minutes - < 3 hours	#N/A	#N/A	#N/A	#N/A	#N/A	#N/A	#N/A	#N/A	#N/A	#N/A	#N/A	#N/A	#N/A	#N/A	#N/A
A-015	A	0	Community - Other	Transit/Transit Hub	0	0	1	0	2	#N/A	#N/A	1	0	0	0	0	0	1	>= 15 minutes	0	1	0	#N/A	1	>= 15 minutes	1	1	15 minutes - < 3 hours	#N/A	#N/A	#N/A	#N/A	#N/A	#N/A	#N/A	#N/A	#N/A	#N/A	#N/A	#N/A	#N/A	#N/A	#N/A
A-016	A	1	Community - Other	Transit/Transit Hub	0	0	1	0	2	#N/A	#N/A	0	0	0	0	0	0	0	#N/A	0	0	0	#N/A	0	#N/A	0	1	#N/A	#N/A	#N/A	#N/A	#N/A	#N/A	#N/A	#N/A	#N/A	#N/A	#N/A	#N/A	#N/A	#N/A	#N/A	#N/A
A-017	A	0	Community - Other	Transit/Transit Hub	0	0	1	0	1	#N/A	#N/A	0	0	0	0	0	0	1	< 15 minutes	0	#N/A	0	#N/A	1	< 15 minutes	0	1	#N/A	#N/A	#N/A	#N/A	#N/A	#N/A	#N/A	#N/A	#N/A	#N/A	#N/A	#N/A	#N/A	#N/A	#N/A	#N/A
A-018	A	0	Community - Other	Transit/Transit Hub	0	0	1	0	1	#N/A	#N/A	0	1	0	0	1	0	0	#N/A	0	0	0	#N/A	1	< 15 minutes	#N/A	1	>= 3 hours	#N/A	#N/A	#N/A	#N/A	#N/A	#N/A	#N/A	#N/A	#N/A	#N/A	#N/A	#N/A	#N/A	#N/A	#N/A
A-019	A	0	Community - Other	Transit/Transit Hub	0	0	1	0	2	#N/A	#N/A	0	0	0	0	0	0	#N/A	#N/A	0	0	0	#N/A	#N/A	#N/A	#N/A	1	#N/A	#N/A	#N/A	#N/A	#N/A	#N/A	#N/A	#N/A	#N/A	#N/A	#N/A	#N/A	#N/A	#N/A	#N/A	#N/A
A-020	A	0	Community - Other	Transit/Transit Hub	0	0	1	0	2	#N/A	#N/A	0	0	0	0	0	0	#N/A	#N/A	0	1	0	#N/A	#N/A	#N/A	#N/A	1	#N/A	#N/A	#N/A	#N/A	#N/A	#N/A	#N/A	#N/A	#N/A	#N/A	#N/A	#N/A	#N/A	#N/A	#N/A	#N/A
A-021	A	0	Community - Other	Transit/Transit Hub	0	0	1	0	1	#N/A	#N/A	0	0	0	0	0	0	0	#N/A	0	#N/A	0	#N/A	0	#N/A	0	1	>= 3 hours	#N/A	#N/A	#N/A	#N/A	#N/A	#N/A	#N/A	#N/A	#N/A	#N/A	#N/A	#N/A	#N/A	#N/A	#N/A
A-022	A	0	Community - Other	Transit/Transit Hub	0	0	1	0	2	#N/A	#N/A	0	0	0	0	0	0	#N/A	>= 15 minutes	0	#N/A	0	#N/A	1	>= 15 minutes	1	1	>= 3 hours	#N/A	#N/A	#N/A	#N/A	#N/A	#N/A	#N/A	#N/A	#N/A	#N/A	#N/A	#N/A	#N/A	#N/A	#N/A
A-023	A	1	Community - Other	Transit/Transit Hub	0	0	1	0	2	#N/A	#N/A	0	0	0	0	0	0	1	>= 15 minutes	0	1	0	#N/A	1	>= 15 minutes	1	1	>= 3 hours	#N/A	#N/A	#N/A	#N/A	#N/A	#N/A	#N/A	#N/A	#N/A	#N/A	#N/A	#N/A	#N/A	#N/A	#N/A
A-024	A	0	Community - Other	Transit/Transit Hub	0	0	1	0	1	#N/A	#N/A	0	0	0	0	0	0	1	< 15 minutes	0	0	0	#N/A	1	< 15 minutes	1	1	>= 3 hours	#N/A	#N/A	#N/A	#N/A	#N/A	#N/A	#N/A	#N/A	#N/A	#N/A	#N/A	#N/A	#N/A	#N/A	#N/A
A-025	A	0	Community - Other	Transit/Transit Hub	0	0	0	0	1	#N/A	#N/A	0	#N/A	0	0	0	0	0	#N/A	0	0	0	#N/A	#N/A	#N/A	1	1	>= 3 hours	#N/A	#N/A	#N/A	#N/A	#N/A	#N/A	#N/A	#N/A	#N/A	#N/A	#N/A	#N/A	#N/A	#N/A	#N/A
A-027	A	0	Community - Other	Transit/Transit Hub	0	0	1	0	1	#N/A	#N/A	0	0	0	0	0	0	1	>= 15 minutes	0	0	0	#N/A	1	>= 15 minutes	1	1	15 minutes - < 3 hours	#N/A	#N/A	#N/A	#N/A	#N/A	#N/A	#N/A	#N/A	#N/A	#N/A	#N/A	#N/A	#N/A	#N/A	#N/A
A-028	A	0	Community - Other	Transit/Transit Hub	0	0	1	0	2	#N/A	#N/A	0	0	0	0	0	0	0	#N/A	0	0	0	#N/A	0	#N/A	0	1	>= 3 hours	#N/A	#N/A	#N/A	#N/A	#N/A	#N/A	#N/A	#N/A	#N/A	#N/A	#N/A	#N/A	#N/A	#N/A	#N/A
A-029	A	0	Community - Other	Transit/Transit Hub	0	0	0	0	2	#N/A	#N/A	0	1	0	0	0	0	1	#N/A	0	0	0	#N/A	1	< 15 minutes	0	1	>= 3 hours	#N/A	#N/A	#N/A	#N/A	#N/A	#N/A	#N/A	#N/A	#N/A	#N/A	#N/A	#N/A	#N/A	#N/A	#N/A
A-030	A	0	Community - Other	Transit/Transit Hub	0	0	0	0	2	#N/A	#N/A	0	0	0	0	0	0	0	#N/A	0	0	0	#N/A	1	< 15 minutes	0	1	#N/A	#N/A	#N/A	#N/A	#N/A	#N/A	#N/A	#N/A	#N/A	#N/A	#N/A	#N/A	#N/A	#N/A	#N/A	#N/A
A-031	A	0	Community - Other	Transit/Transit Hub	0	0	1	0	1	#N/A	#N/A	0	0	0	0	0	0	0	#N/A	0	0	0	#N/A	0	#N/A	0	1	>= 3 hours	#N/A	#N/A	#N/A	#N/A	#N/A	#N/A	#N/A	#N/A	#N/A	#N/A	#N/A	#N/A	#N/A	#N/A	#N/A
A-032	A	0	Community - Other	Transit/Transit Hub	0	0	1	0	2	#N/A	#N/A	0	0	1	0	0	0	0	#N/A	0	1	0	#N/A	1	< 15 minutes	#N/A	1	>= 3 hours	#N/A	#N/A	#N/A	#N/A	#N/A	#N/A	#N/A	#N/A	#N/A	#N/A	#N/A	#N/A	#N/A	#N/A	#N/A
A-001	A	1	Household	Private Home	0	0	1	1	2	18 - 44 years	#N/A	#N/A	#N/A	#N/A	#N/A	#N/A	1	#N/A	#N/A	#N/A	#N/A	#N/A	#N/A	#N/A	#N/A	#N/A	#N/A	#N/A	#N/A	#N/A	#N/A	#N/A	#N/A	#N/A	#N/A	#N/A	#N/A	#N/A	#N/A	#N/A	#N/A	#N/A	#N/A
A-002	A	1	Household	Private Home	0	0	1	1	1	< 10 years	#N/A	#N/A	#N/A	#N/A	#N/A	#N/A	0	#N/A	#N/A	#N/A	#N/A	#N/A	#N/A	#N/A	#N/A	#N/A	#N/A	#N/A	#N/A	#N/A	#N/A	#N/A	#N/A	#N/A	#N/A	#N/A	#N/A	#N/A	#N/A	#N/A	#N/A	#N/A	#N/A
D-002	D	0	Household	Private Home	0	0	1	1	1	18 - 44 years	Asian	2	0	0	0	0	0	1	>= 15 minutes	0	1	1	> 1 hour	1	>= 15 minutes	1	1	>= 3 hours	#N/A	#N/A	#N/A	#N/A	#N/A	#N/A	#N/A	#N/A	#N/A	#N/A	#N/A	#N/A	#N/A	#N/A	#N/A
D-003	D	0	Community - Other	Private Home	0	0	1	1	2	18 - 44 years	Asian	2	0	0	0	0	0	1	#N/A	0	1	0	#N/A	1	>= 15 minutes	1	1	#N/A	#N/A	#N/A	#N/A	#N/A	#N/A	#N/A	#N/A	#N/A	#N/A	#N/A	#N/A	#N/A	#N/A	#N/A	#N/A
D-004	D	0	Household	Private Home	0	0	1	1	2	45 - 64 years	Asian	0	0	0	0	0	1	1	>= 15 minutes	1	1	1	> 1 hour	1	>= 15 minutes	1	1	>= 3 hours	#N/A	#N/A	#N/A	#N/A	#N/A	#N/A	#N/A	#N/A	#N/A	#N/A	#N/A	#N/A	#N/A	#N/A	#N/A
D-005	D	0	Healthcare Worker*	Healthcare	0	0	0	0	2	18 - 44 years	Hispanic/Latino	0	0	0	1	0	0	1	< 15 minutes	0	1	0	#N/A	#N/A	#N/A	0	0	#N/A	#N/A	#N/A	#N/A	#N/A	#N/A	#N/A	#N/A	#N/A	#N/A	#N/A	#N/A	#N/A	#N/A	0	0
D-006	D	0	Healthcare Worker*	Healthcare	0	0	0	0	2	18 - 44 years	Hispanic/Latino	2	0	0	0	#N/A	0	0	#N/A	0	0	0	#N/A	0	#N/A	0	0	#N/A	#N/A	#N/A	#N/A	#N/A	#N/A	#N/A	#N/A	#N/A	#N/A	#N/A	#N/A	#N/A	#N/A	0	0
D-007	D	0	Community - Healthcare Setting	Healthcare	0	0	0	0	2	45 - 64 years	Hispanic/Latino	0	0	1	0	0	0	0	#N/A	0	0	0	#N/A	0	#N/A	0	1	< 15 minutes	#N/A	#N/A	#N/A	#N/A	#N/A	#N/A	#N/A	#N/A	#N/A	#N/A	#N/A	#N/A	#N/A	#N/A	#N/A
D-008	D	0	Community - Healthcare Setting	Healthcare	0	0	0	0	2	18 - 44 years	Hispanic/Latino	0	0	0	0	0	0	1	< 15 minutes	0	0	0	#N/A	1	< 15 minutes	#N/A	1	< 15 minutes	#N/A	#N/A	#N/A	#N/A	#N/A	#N/A	#N/A	#N/A	#N/A	#N/A	#N/A	#N/A	#N/A	#N/A	#N/A
D-009	D	0	Healthcare Worker*	Healthcare	0	0	0	0	2	18 - 44 years	White, Non-Hispanic	1	0	0	0	0	0	1	< 15 minutes	0	1	0	#N/A	1	< 15 minutes	0	1	< 15 minutes	#N/A	#N/A	1	1	#N/A	#N/A	#N/A	#N/A	1	#N/A	1	#N/A	#N/A	0	0
D-010	D	0	Healthcare Worker*	Healthcare	0	0	0	0	1	18 - 44 years	Asian	#N/A	0	0	0	#N/A	0	1	>= 15 minutes	1	0	0	#N/A	1	>= 15 minutes	1	1	>= 3 hours	2	0	0	0	0	0	0	2	0	0	0	0	0	1	1
D-011	D	0	Healthcare Worker*	Healthcare	0	0	0	0	2	#N/A	Asian	1	0	0	0	0	0	1	< 15 minutes	0	0	0	#N/A	1	#N/A	0	1	#N/A	#N/A	#N/A	#N/A	#N/A	#N/A	#N/A	#N/A	#N/A	#N/A	#N/A	#N/A	#N/A	#N/A	0	0
D-012	D	0	Healthcare Worker*	Healthcare	0	0	0	0	2	18 - 44 years	Asian	#N/A	#N/A	#N/A	#N/A	#N/A	0	1	#N/A	1	0	0	#N/A	1	#N/A	0	1	#N/A	2	0	0	0	0	0	0	#N/A	#N/A	#N/A	#N/A	#N/A	#N/A	1	0
D-013	D	0	Healthcare Worker*	Healthcare	0	0	0	0	2	18 - 44 years	Black, Non-Hispanic	0	0	0	0	#N/A	0	1	>= 15 minutes	1	0	0	#N/A	1	>= 15 minutes	0	1	15 minutes - < 3 hours	2	0	0	0	0	0	0	#N/A	#N/A	#N/A	#N/A	#N/A	#N/A	1	0
D-014	D	0	Healthcare Worker*	Healthcare	0	0	0	0	2	18 - 44 years	White, Non-Hispanic	0	0	0	0	0	0	1	< 15 minutes	1	0	0	#N/A	1	< 15 minutes	0	1	< 15 minutes	2	0	0	0	0	0	0	#N/A	#N/A	#N/A	#N/A	#N/A	#N/A	1	0
D-015	D	0	Healthcare Worker*	Healthcare	0	0	0	0	2	18 - 44 years	Asian	1	0	0	0	#N/A	0	1	< 15 minutes	1	1	0	#N/A	1	< 15 minutes	0	1	< 15 minutes	2	0	0	0	0	0	0	#N/A	#N/A	#N/A	#N/A	#N/A	#N/A	1	0
D-016	D	0	Healthcare Worker*	Healthcare	0	0	1	1	2	45 - 64 years	White, Non-Hispanic	1	0	0	0	0	0	1	>= 15 minutes	1	0	0	#N/A	1	>= 15 minutes	1	1	15 minutes - < 3 hours	0	0	0	1	0	0	0	#N/A	#N/A	#N/A	#N/A	#N/A	#N/A	1	0
D-017	D	1	Healthcare Worker*	Healthcare	0	0	1	1	2	18 - 44 years	White, Non-Hispanic	0	0	0	0	0	0	1	#N/A	1	1	0	#N/A	1	#N/A	1	1	#N/A	0	0	0	0	0	0	0	0	0	0	0	0	0	1	1
D-018	D	0	Healthcare Worker*	Healthcare	0	0	0	0	1	18 - 44 years	Hispanic/Latino	0	1	0	0	0	0	1	< 15 minutes	1	1	0	#N/A	1	< 15 minutes	0	1	< 15 minutes	2	0	0	0	0	0	0	#N/A	#N/A	#N/A	#N/A	#N/A	#N/A	1	0
D-019	D	0	Healthcare Worker*	Healthcare	0	0	0	0	1	18 - 44 years	Asian	0	0	0	0	0	0	1	< 15 minutes	1	0	0	#N/A	1	< 15 minutes	0	1	< 15 minutes	#N/A	#N/A	#N/A	#N/A	#N/A	#N/A	#N/A	#N/A	#N/A	#N/A	#N/A	#N/A	#N/A	0	0
D-020	D	0	Healthcare Worker*	Healthcare	0	0	1	1	1	45 - 64 years	Asian	0	0	0	0	#N/A	0	0	#N/A	0	0	0	#N/A	0	#N/A	0	1	< 15 minutes	0	0	1	0	0	0	0	#N/A	#N/A	#N/A	#N/A	#N/A	#N/A	1	0
D-021	D	0	Healthcare Worker*	Healthcare	0	0	1	1	1	18 - 44 years	Asian	2	0	0	0	0	0	1	>= 15 minutes	0	0	0	#N/A	1	< 15 minutes	#N/A	1	< 15 minutes	#N/A	#N/A	1	#N/A	#N/A	#N/A	#N/A	#N/A	#N/A	#N/A	#N/A	#N/A	#N/A	0	0
D-022	D	0	Healthcare Worker*	Healthcare	0	0	0	0	2	65+ years	Asian	0	0	0	0	0	0	1	< 15 minutes	0	1	0	#N/A	1	< 15 minutes	0	1	< 15 minutes	2	0	0	0	0	0	0	#N/A	#N/A	#N/A	#N/A	#N/A	#N/A	1	0
D-023	D	0	Healthcare Worker*	Healthcare	0	0	0	0	1	45 - 64 years	Hispanic/Latino	0	0	0	#N/A	0	0	0	#N/A	0	0	0	#N/A	0	#N/A	0	0	#N/A	#N/A	#N/A	#N/A	#N/A	#N/A	#N/A	#N/A	#N/A	#N/A	#N/A	#N/A	#N/A	#N/A	0	0
D-025	D	0	Healthcare Worker*	Healthcare	0	0	0	0	1	45 - 64 years	White, Non-Hispanic	0	0	0	0	0	0	1	#N/A	1	0	0	#N/A	1	#N/A	1	1	#N/A	#N/A	#N/A	#N/A	#N/A	#N/A	#N/A	#N/A	#N/A	#N/A	#N/A	#N/A	#N/A	#N/A	0	0
D-027	D	0	Healthcare Worker*	Healthcare	0	0	1	1	1	18 - 44 years	Other	0	0	0	0	0	0	1	>= 15 minutes	1	0	0	#N/A	1	>= 15 minutes	1	1	15 minutes - < 3 hours	0	0	1	1	1	0	0	1	0	0	0	0	0	1	1
D-036	D	0	Healthcare Worker*	Healthcare	0	0	0	0	1	18 - 44 years	White, Non-Hispanic	0	0	0	0	0	0	#N/A	#N/A	0	#N/A	0	#N/A	#N/A	#N/A	#N/A	#N/A	#N/A	#N/A	1	1	1	#N/A	#N/A	#N/A	#N/A	#N/A	#N/A	#N/A	#N/A	#N/A	0	0
D-037	D	0	Healthcare Worker*	Healthcare	0	0	0	0	2	45 - 64 years	White, Non-Hispanic	0	0	0	0	0	0	1	>= 15 minutes	1	1	0	#N/A	1	>= 15 minutes	1	1	15 minutes - < 3 hours	2	0	0	0	0	0	0	2	0	0	0	0	0	1	1
D-038	D	0	Healthcare Worker*	Healthcare	0	0	0	0	2	45 - 64 years	Asian	1	0	0	0	0	0	1	#N/A	1	0	0	#N/A	1	#N/A	1	1	#N/A	#N/A	#N/A	#N/A	#N/A	#N/A	#N/A	#N/A	#N/A	#N/A	#N/A	#N/A	#N/A	#N/A	0	0
D-039	D	0	Healthcare Worker*	Healthcare	0	0	0	0	2	18 - 44 years	White, Non-Hispanic	0	0	0	0	0	0	1	#N/A	1	0	0	#N/A	1	#N/A	1	1	#N/A	#N/A	#N/A	#N/A	#N/A	#N/A	#N/A	#N/A	#N/A	#N/A	#N/A	#N/A	#N/A	#N/A	0	0
D-040	D	0	Healthcare Worker*	Healthcare	0	0	0	0	2	18 - 44 years	Asian	1	0	0	0	0	0	1	#N/A	1	0	0	#N/A	1	#N/A	1	1	#N/A	#N/A	#N/A	#N/A	#N/A	#N/A	#N/A	#N/A	#N/A	#N/A	#N/A	#N/A	#N/A	#N/A	0	0
D-041	D	0	Healthcare Worker*	Healthcare	0	0	0	0	2	18 - 44 years	Asian	0	0	0	0	0	0	1	>= 15 minutes	1	1	0	#N/A	1	>= 15 minutes	0	1	15 minutes - < 3 hours	#N/A	#N/A	#N/A	#N/A	#N/A	#N/A	#N/A	#N/A	#N/A	#N/A	#N/A	#N/A	#N/A	0	0
D-042	D	0	Healthcare Worker*	Healthcare	0	0	0	0	2	18 - 44 years	Asian	0	0	0	0	0	0	1	>= 15 minutes	1	0	0	#N/A	1	>= 15 minutes	0	1	15 minutes - < 3 hours	#N/A	#N/A	#N/A	#N/A	#N/A	#N/A	#N/A	#N/A	#N/A	#N/A	#N/A	#N/A	#N/A	0	0
D-043	D	0	Healthcare Worker*	Healthcare	0	0	0	0	1	45 - 64 years	White, Non-Hispanic	0	1	0	0	0	0	1	>= 15 minutes	1	0	0	#N/A	1	#N/A	1	1	#N/A	#N/A	#N/A	#N/A	#N/A	#N/A	#N/A	#N/A	#N/A	#N/A	#N/A	#N/A	#N/A	#N/A	0	0
D-044	D	0	Healthcare Worker*	Private Home	0	0	0	0	2	45 - 64 years	White, Non-Hispanic	1	0	0	0	0	0	1	>= 15 minutes	0	1	0	#N/A	1	>= 15 minutes	0	1	15 minutes - < 3 hours	#N/A	#N/A	#N/A	#N/A	#N/A	#N/A	#N/A	2	0	0	0	0	0	0	1
D-045	D	0	Healthcare Worker*	Private Home	0	0	0	0	1	18 - 44 years	Asian	0	0	1	0	0	0	1	>= 15 minutes	1	1	0	#N/A	1	>= 15 minutes	1	1	15 minutes - < 3 hours	#N/A	#N/A	#N/A	#N/A	#N/A	#N/A	#N/A	2	0	0	0	0	0	0	1
B-001	B	1	Household	Private Home	0	1	1	1	2	45 - 64 years	#N/A	0	#N/A	#N/A	#N/A	#N/A	1	#N/A	#N/A	#N/A	#N/A	#N/A	#N/A	#N/A	#N/A	#N/A	#N/A	#N/A	#N/A	#N/A	#N/A	#N/A	#N/A	#N/A	#N/A	#N/A	#N/A	#N/A	#N/A	#N/A	#N/A	#N/A	#N/A
F-250	F	1	Community - Other	Workplace (non-HC)	0	0	1	0	2	18 - 44 years	#N/A	#N/A	#N/A	#N/A	#N/A	#N/A	0	1	#N/A	1	#N/A	0	#N/A	#N/A	#N/A	#N/A	1	#N/A	#N/A	#N/A	#N/A	#N/A	#N/A	#N/A	#N/A	#N/A	#N/A	#N/A	#N/A	#N/A	#N/A	#N/A	#N/A
E-001	E	0	Household	Private Home	1	0	1	1	1	45 - 64 years	#N/A	#N/A	#N/A	#N/A	#N/A	#N/A	1	#N/A	#N/A	#N/A	#N/A	#N/A	#N/A	#N/A	#N/A	#N/A	#N/A	#N/A	#N/A	#N/A	#N/A	#N/A	#N/A	#N/A	#N/A	#N/A	#N/A	#N/A	#N/A	#N/A	#N/A	#N/A	#N/A
E-002	E	0	Household	Private Home	1	0	1	1	1	18 - 44 years	#N/A	#N/A	#N/A	#N/A	#N/A	#N/A	0	#N/A	#N/A	#N/A	#N/A	#N/A	#N/A	#N/A	#N/A	#N/A	#N/A	#N/A	#N/A	#N/A	#N/A	#N/A	#N/A	#N/A	#N/A	#N/A	#N/A	#N/A	#N/A	#N/A	#N/A	#N/A	#N/A
E-005	E	0	Healthcare Worker*	Healthcare	0	0	0	0	#N/A	#N/A	#N/A	#N/A	#N/A	#N/A	#N/A	#N/A	0	#N/A	#N/A	#N/A	#N/A	#N/A	#N/A	#N/A	#N/A	#N/A	#N/A	#N/A	0	0	1	0	#N/A	1	0	0	1	0	1	1	0	1	1
G-001	G	0	Household	Private Home	1	0	1	1	1	45 - 64 years	#N/A	#N/A	#N/A	#N/A	#N/A	#N/A	1	#N/A	#N/A	#N/A	#N/A	#N/A	#N/A	#N/A	#N/A	#N/A	#N/A	#N/A	#N/A	#N/A	#N/A	#N/A	#N/A	#N/A	#N/A	#N/A	#N/A	#N/A	#N/A	#N/A	#N/A	#N/A	#N/A
G-002	G	0	Household	Private Home	0	0	1	1	1	18 - 44 years	Asian	#N/A	#N/A	#N/A	#N/A	#N/A	0	#N/A	#N/A	#N/A	#N/A	#N/A	#N/A	#N/A	#N/A	#N/A	#N/A	#N/A	#N/A	#N/A	#N/A	#N/A	#N/A	#N/A	#N/A	#N/A	#N/A	#N/A	#N/A	#N/A	#N/A	#N/A	#N/A
G-003	G	0	Household	Private Home	0	0	1	1	2	10 - 18 years	Asian	#N/A	#N/A	#N/A	#N/A	#N/A	0	#N/A	#N/A	#N/A	#N/A	#N/A	#N/A	#N/A	#N/A	#N/A	#N/A	#N/A	#N/A	#N/A	#N/A	#N/A	#N/A	#N/A	#N/A	#N/A	#N/A	#N/A	#N/A	#N/A	#N/A	#N/A	#N/A
G-004	G	0	Community - Other	Transit/Transit Hub	0	0	1	0	2	18 - 44 years	White, Non-Hispanic	#N/A	#N/A	#N/A	#N/A	#N/A	0	#N/A	#N/A	#N/A	#N/A	1	> 1 hour	1	#N/A	#N/A	1	#N/A	#N/A	#N/A	#N/A	#N/A	#N/A	#N/A	#N/A	#N/A	#N/A	#N/A	#N/A	#N/A	#N/A	#N/A	#N/A
G-005	G	0	Community - Other	Transit/Transit Hub	0	0	1	0	2	18 - 44 years	White, Non-Hispanic	#N/A	#N/A	#N/A	#N/A	#N/A	0	#N/A	#N/A	#N/A	#N/A	1	> 1 hour	1	#N/A	#N/A	1	#N/A	#N/A	#N/A	#N/A	#N/A	#N/A	#N/A	#N/A	#N/A	#N/A	#N/A	#N/A	#N/A	#N/A	#N/A	#N/A
G-006	G	0	Community - Other	Transit/Transit Hub	0	0	1	0	1	18 - 44 years	#N/A	#N/A	#N/A	#N/A	#N/A	#N/A	0	#N/A	#N/A	#N/A	#N/A	1	> 1 hour	1	#N/A	#N/A	1	#N/A	#N/A	#N/A	#N/A	#N/A	#N/A	#N/A	#N/A	#N/A	#N/A	#N/A	#N/A	#N/A	#N/A	#N/A	#N/A
G-007	G	0	Community - Other	Transit/Transit Hub	0	0	1	0	1	45 - 64 years	#N/A	#N/A	#N/A	#N/A	#N/A	#N/A	0	#N/A	#N/A	#N/A	#N/A	1	> 1 hour	1	#N/A	#N/A	1	#N/A	#N/A	#N/A	#N/A	#N/A	#N/A	#N/A	#N/A	#N/A	#N/A	#N/A	#N/A	#N/A	#N/A	#N/A	#N/A
G-008	G	0	Community - Other	Transit/Transit Hub	0	0	1	0	1	18 - 44 years	#N/A	#N/A	#N/A	#N/A	#N/A	#N/A	0	#N/A	#N/A	#N/A	#N/A	1	> 1 hour	1	#N/A	#N/A	#N/A	#N/A	#N/A	#N/A	#N/A	#N/A	#N/A	#N/A	#N/A	#N/A	#N/A	#N/A	#N/A	#N/A	#N/A	#N/A	#N/A
G-009	G	0	Community - Other	Transit/Transit Hub	0	0	1	0	2	18 - 44 years	#N/A	#N/A	#N/A	#N/A	#N/A	#N/A	0	#N/A	#N/A	#N/A	#N/A	1	> 1 hour	1	#N/A	#N/A	1	#N/A	#N/A	#N/A	#N/A	#N/A	#N/A	#N/A	#N/A	#N/A	#N/A	#N/A	#N/A	#N/A	#N/A	#N/A	#N/A
G-010	G	0	Community - Other	Transit/Transit Hub	0	0	1	0	2	18 - 44 years	#N/A	#N/A	#N/A	#N/A	#N/A	#N/A	0	#N/A	#N/A	#N/A	#N/A	1	> 1 hour	1	#N/A	#N/A	#N/A	#N/A	#N/A	#N/A	#N/A	#N/A	#N/A	#N/A	#N/A	#N/A	#N/A	#N/A	#N/A	#N/A	#N/A	#N/A	#N/A
G-011	G	0	Community - Other	Transit/Transit Hub	0	0	1	0	1	45 - 64 years	White, Non-Hispanic	#N/A	#N/A	#N/A	#N/A	#N/A	0	#N/A	#N/A	#N/A	#N/A	1	> 1 hour	1	#N/A	#N/A	#N/A	#N/A	#N/A	#N/A	#N/A	#N/A	#N/A	#N/A	#N/A	#N/A	#N/A	#N/A	#N/A	#N/A	#N/A	#N/A	#N/A
G-013	G	0	Community - Other	Transit/Transit Hub	0	0	0	0	1	18 - 44 years	#N/A	#N/A	#N/A	#N/A	#N/A	#N/A	0	#N/A	#N/A	#N/A	#N/A	1	> 1 hour	1	#N/A	#N/A	1	#N/A	#N/A	#N/A	#N/A	#N/A	#N/A	#N/A	#N/A	#N/A	#N/A	#N/A	#N/A	#N/A	#N/A	#N/A	#N/A
G-014	G	1	Community - Other	Transit/Transit Hub	0	0	1	1	1	65+ years	#N/A	#N/A	#N/A	#N/A	#N/A	#N/A	0	#N/A	#N/A	#N/A	#N/A	1	> 1 hour	1	#N/A	#N/A	#N/A	#N/A	#N/A	#N/A	#N/A	#N/A	#N/A	#N/A	#N/A	#N/A	#N/A	#N/A	#N/A	#N/A	#N/A	#N/A	#N/A
G-015	G	1	Healthcare Worker*	Healthcare	0	0	1	0	1	18 - 44 years	Hispanic/Latino	#N/A	#N/A	#N/A	#N/A	#N/A	0	#N/A	#N/A	#N/A	#N/A	0	#N/A	0	#N/A	#N/A	#N/A	#N/A	#N/A	#N/A	#N/A	#N/A	#N/A	#N/A	#N/A	#N/A	#N/A	#N/A	#N/A	#N/A	#N/A	0	0
G-016	G	1	Healthcare Worker*	Healthcare	0	0	1	0	2	18 - 44 years	White, Non-Hispanic	#N/A	#N/A	#N/A	#N/A	#N/A	0	#N/A	#N/A	#N/A	#N/A	0	#N/A	0	#N/A	#N/A	#N/A	#N/A	#N/A	#N/A	#N/A	#N/A	#N/A	#N/A	#N/A	#N/A	#N/A	#N/A	#N/A	#N/A	#N/A	0	0
G-017	G	1	Healthcare Worker*	Healthcare	0	0	1	0	2	18 - 44 years	White, Non-Hispanic	#N/A	#N/A	#N/A	#N/A	#N/A	0	1	#N/A	1	1	#N/A	#N/A	#N/A	#N/A	#N/A	#N/A	#N/A	#N/A	#N/A	#N/A	#N/A	#N/A	#N/A	#N/A	#N/A	#N/A	#N/A	#N/A	#N/A	#N/A	0	0
G-018	G	1	Healthcare Worker*	Healthcare	0	0	1	0	2	18 - 44 years	White, Non-Hispanic	#N/A	#N/A	#N/A	#N/A	#N/A	0	#N/A	#N/A	#N/A	#N/A	0	#N/A	0	#N/A	#N/A	1	#N/A	2	#N/A	#N/A	#N/A	#N/A	#N/A	#N/A	#N/A	#N/A	#N/A	#N/A	#N/A	#N/A	1	0
G-516	G	0	Community - Other	Transit/Transit Hub	0	0	0	0	1	45 - 64 years	White, Non-Hispanic	#N/A	#N/A	#N/A	#N/A	#N/A	0	#N/A	#N/A	#N/A	#N/A	1	#N/A	#N/A	#N/A	#N/A	1	#N/A	#N/A	#N/A	#N/A	#N/A	#N/A	#N/A	#N/A	#N/A	#N/A	#N/A	#N/A	#N/A	#N/A	#N/A	#N/A
G-519	G	0	Community - Other	Transit/Transit Hub	0	0	0	0	1	#N/A	#N/A	#N/A	#N/A	#N/A	#N/A	#N/A	0	#N/A	#N/A	#N/A	#N/A	#N/A	#N/A	#N/A	#N/A	#N/A	#N/A	#N/A	#N/A	#N/A	#N/A	#N/A	#N/A	#N/A	#N/A	#N/A	#N/A	#N/A	#N/A	#N/A	#N/A	#N/A	#N/A
G-528	G	0	Community - Other	Transit/Transit Hub	0	0	0	0	1	#N/A	White, Non-Hispanic	#N/A	0	0	0	#N/A	0	#N/A	#N/A	#N/A	#N/A	1	#N/A	#N/A	#N/A	#N/A	#N/A	#N/A	#N/A	#N/A	#N/A	#N/A	#N/A	#N/A	#N/A	#N/A	#N/A	#N/A	#N/A	#N/A	#N/A	#N/A	#N/A
G-533	G	0	Community - Other	Transit/Transit Hub	0	0	0	0	2	18 - 44 years	#N/A	#N/A	0	0	0	#N/A	0	1	#N/A	0	1	1	#N/A	#N/A	#N/A	1	1	#N/A	#N/A	#N/A	#N/A	#N/A	#N/A	#N/A	#N/A	#N/A	#N/A	#N/A	#N/A	#N/A	#N/A	#N/A	#N/A
I-001	I	1	Household	Private Home	1	0	1	1	2	45 - 64 years	#N/A	#N/A	#N/A	#N/A	#N/A	#N/A	1	#N/A	#N/A	#N/A	#N/A	#N/A	#N/A	#N/A	#N/A	#N/A	#N/A	#N/A	#N/A	#N/A	#N/A	#N/A	#N/A	#N/A	#N/A	#N/A	#N/A	#N/A	#N/A	#N/A	#N/A	#N/A	#N/A
F-251	F	1	Healthcare Worker*	Healthcare	0	0	1	0	1	18 - 44 years	White, Non-Hispanic	#N/A	#N/A	#N/A	#N/A	#N/A	0	#N/A	#N/A	#N/A	#N/A	#N/A	#N/A	#N/A	#N/A	#N/A	#N/A	#N/A	2	0	0	0	0	0	0	#N/A	#N/A	#N/A	#N/A	#N/A	#N/A	1	0
I-010	I	1	Community - Other	Transit/Transit Hub	0	0	1	1	#N/A	#N/A	#N/A	#N/A	#N/A	#N/A	#N/A	#N/A	0	#N/A	#N/A	#N/A	#N/A	#N/A	#N/A	#N/A	#N/A	#N/A	#N/A	#N/A	#N/A	#N/A	#N/A	#N/A	#N/A	#N/A	#N/A	#N/A	#N/A	#N/A	#N/A	#N/A	#N/A	#N/A	#N/A
I-011	I	1	Community - Other	Transit/Transit Hub	0	0	1	1	#N/A	#N/A	#N/A	#N/A	#N/A	#N/A	#N/A	#N/A	0	#N/A	#N/A	#N/A	#N/A	#N/A	#N/A	#N/A	#N/A	#N/A	#N/A	#N/A	#N/A	#N/A	#N/A	#N/A	#N/A	#N/A	#N/A	#N/A	#N/A	#N/A	#N/A	#N/A	#N/A	#N/A	#N/A
I-012	I	1	Community - Healthcare Setting	Healthcare	0	0	1	1	#N/A	#N/A	#N/A	#N/A	#N/A	#N/A	#N/A	#N/A	0	#N/A	#N/A	#N/A	#N/A	0	#N/A	#N/A	#N/A	#N/A	#N/A	#N/A	#N/A	#N/A	#N/A	#N/A	#N/A	#N/A	#N/A	#N/A	#N/A	#N/A	#N/A	#N/A	#N/A	#N/A	#N/A

## Sheet: Dictionary
#N/A denotes missing data or non-applicable
Question / Concept	Variable Name	Values, Labels	Type
Identifier of the contact	Contact_ID	Formatted as source case, hyphen, numeric	Character
Source case of the contact	source_case	A - I	Character
Whether the contact met the definition of a "Person Under Investigation" at any point in time. I.e., whether contact developed symptoms concerning for COVID-19 within 14 days of last exposure to the source case	PUI_YN	0 = No 1 = Yes	Numeric
Contact grouping - household member (habitually lives with or spent at least one night in the same residence as the source case; healthcare personnel - encountered the source case as their healthcare provider, as another healthcare employee in the healthcare setting, or performed environmental services in the healthcare setting during which they may have come into contact with infectious material…	mastertype	Household Healthcare Worker* Community - Healthcare Setting Community - Other	Character
Exposure setting where the contact was exposed - Private home, Healthcare, Workplace (non-Healthcare), Transit or Transit Hub, Other	master_expset	Private home Healthcare Workplace (non-healthcare) Transit or transit hub Other	Character
Whether the contact had ongoing household exposure to the source case after the case was diagnosed and instructed to self-isolate	ongoing_HHexp	0 = No 1 = Yes	Numeric
Whether the contact tested positive for SARS-CoV-2	case	0 = No 1 = Yes	Numeric
Whether the contact had any respiratory specimens collected and tested for SARS-CoV-2	anysample	0 = No samples 1 = At least one sample	Numeric
Whether the contact had more than one set of respiratory specimens collected and tested for SARS-CoV-2	sampled_gt1vsnot	0 = No samples or only a single set of samples 1 = More than one set of samples	Numeric
Sex of contact	ContactQ_Sex	1 = Male 2 = Female 3 = Other	Numeric
Age group of contact	ContactQ_agecat	< 10 years 10 - 18 years 18 - 44 years 45 - 64 years 65+ years	Character
Self-reported race/ethnicity group of contact	ContactQ_race_ethcat	White, Non-Hispanic Black, Non-Hispanic Hispanic/Latino Asian Other	Character
Smoking history of the contact	ContactQ_smokingcat	0 = Never smoked 1 = Former smoker 2 = Current smoker	Numeric
Do you have any of the following pre-existing medical conditions? Cardiovascular disease (hypertension, coronary artery disease, heart failure / congestive heart failure, cerebrovascular accident / stroke, congenital heart disease, other heart disease)	ContactQ_CVD_any	0 = No 1 = Yes	Numeric
Do you have any of the following pre-existing medical conditions? Chronic lung disease (COPD, emphysema, asthma / reactive airway disease, other chronic lung disease)	ContactQ_CLD_any	0 = No 1 = Yes	Numeric
Do you have any of the following pre-existing medical conditions? Immunosuppressive condition (e.g., HIV, AIDS, solid organ transplant, stem cell transplant)	ContactQ_immsupp_any	0 = No 1 = Yes	Numeric
Do you have any of the following pre-existing medical conditions? Diabetes Mellitus (Type 1, Type 2)	ContactQ_diabetes_any	0 = No 1 = Yes	Numeric
Contact's relationship to source case: spouse or partner	ContactQ_relat_spousepartner	0 = No 1 = Yes	Numeric
During the period of potential exposure, which was [date of symptom onset in 2019-nCoV case-patient] to [date of last contact with 2019-nCoV case-patient], did/were you….
have face to face contact with the source case-patient?	ContactQ_pexp_ftf_yn	0 = No 1 = Yes	Numeric
Estimated duration	ContactQ_ftf_dur_cat2	< 15 minutes >= 15 minutes	Character
have direct physical contact with the source case-patient?	ContactQ_pexp_phys_yn	0 = No 1 = Yes	Numeric
take an object handed from or handled by the source case-patient?	ContactQ_pexp_obj_yn	0 = No 1 = Yes	Numeric
travel in the same vehicle sitting within 6 feet of the source case-patient? (including airplane)	ContactQ_pexp_veh_yn	0 = No 1 = Yes	Numeric
Estimated duration	ContactQ_veh_dur_cat	< 1 hour >= 1 hour	Character
physically within 6 feet of the source case-patient?	ContactQ_pexp_6ft_yn	0 = No 1 = Yes	Numeric
Estimated duration	ContactQ_6ft_dur_cat2	< 15 minutes >= 15 minutes	Character
Within 6 feet while the source case-patient was coughing or sneezing?	ContactQ_pexp_cgh_yn	0 = No 1 = Yes	Numeric
in the same room as the source case-patient?	ContactQ_pexp_rm_yn	0 = No 1 = Yes	Numeric
Estimated duration	ContactQ_rm_dur_cat2	< 15 minutes 15 minutes - < 3 hours >= 3 hours	Character
PPE Category worn by healthcare worker during patient care	HCWQ_carePPE_cat	2 = Airbone & contact (gloves, gown, eye protection, PAPR or N95 with fit testing in last year) 1 = Droplet & contact (gloves, gown, eye protection, mask) 0 = Less than above (any combination of PPE not meeting the above categories)	Character
HCP provided care without gloves	HCWQ_Cared_NOGloves_YN	0 = No (PPE worn) 1 = Yes (PPE NOT worn)	Numeric
HCP provided care without gown	HCWQ_Cared_NOGown_YN	0 = No (PPE worn) 1 = Yes (PPE NOT worn)	Numeric
HCP provided care without goggles / eye protection	HCWQ_Cared_NOGoggles_YN	0 = No (PPE worn) 1 = Yes (PPE NOT worn)	Numeric
HCP provided care with a respirator but without a recent fit test	HCWQ_Cared_NonFittedResp_YN	0 = No (PPE worn) 1 = Yes (PPE NOT worn)	Numeric
HCP provided care with a mask only (no respirator / PAPR)	HCWQ_Cared_MaskOnly_YN	0 = No (PPE worn) 1 = Yes (PPE NOT worn)	Numeric
HCP provided care without a mask or respirator/PAPR	HCWQ_Cared_NOMaskorResp_YN	0 = No (PPE worn) 1 = Yes (PPE NOT worn)	Numeric
PPE Category worn by healthcare worker when taking NP/OP sample	HCWQ_NPOP_PPE_cat	2 = Airbone & contact (gloves, gown, eye protection, PAPR or N95 with fit testing in last year) 1 = Droplet & contact (gloves, gown, eye protection, mask) 0 = Less than above (any combination of PPE not meeting the above categories)	Character
HCP took NP/OP while not wearing gown	HCWQ_NPOP_NOGown_YN	0 = No (PPE worn) 1 = Yes (PPE NOT worn)	Numeric
HCP took NP/OP while not wearing gloves	HCWQ_NPOP_NOGloves_YN	0 = No (PPE worn) 1 = Yes (PPE NOT worn)	Numeric
HCP took NP/OP while not wearing goggles / eye protection	HCWQ_NPOP_NOGoggles_YN	0 = No (PPE worn) 1 = Yes (PPE NOT worn)	Numeric
HCP took NP/OP while wearing a mask (no respirator / PAPR)	HCWQ_NPOP_MaskOnly_YN	0 = No (PPE worn) 1 = Yes (PPE NOT worn)	Numeric
HCP took NP/OP while not wearing mask or respirator / PAPR	HCWQ_NPOP_NOMaskorResp_YN	0 = No (PPE worn) 1 = Yes (PPE NOT worn)	Numeric
Healthcare personnel reported touching the patient or providing patient care	HCWQ_cared_forpt	0 = No 1 = Yes	Numeric
Healthcare personnel reported taking a nasopharyngeal or oropharyngeal sample from the patient	HCWQ_took_NPOP	0 = No 1 = Yes	Numeric
